# Supplementary material
Source: publisher figshare collection journal article supplement (https://gsapubs.figshare.com/articles/dataset/_/16415781)
Supplement: Supplementary file 1 [file 1]

Rodríguez, C., Francisco Pereira, M., Castro, A., Gutiérrez-Alonso, G., and Fernández, C., 2021, Variscan intracrustal recycling by melting of Carboniferous arc-like igneous protoliths (Évora Massif, Iberian Variscan belt): GSA Bulletin, <https://doi.org/10.1130/B36111.1>.

## Supplemental Material

**Table S1.** SHRIMP U-Pb-Th zircon data of samples from Alto de São Bento (Évora Massif).

**Table S2.** Amphibole thermobarometry results on the microprobe analyses from plutonic rocks of Hospistais intrusion (Moita, 2007).
