# Supplementary material
Source: publisher figshare collection journal article supplement (https://gsapubs.figshare.com/articles/dataset/_/16415781)
Supplement: Supplementary file 1 [file 1]

## Sheet: Hoja2
Table S1. SHRIMP U-Pb-Th zircon data of samples from Alto de São Bento (Évora Massif)
							common lead uncorrected											common lead uncorrected									207-corrected				207-corrected				204-corrected									204-corrected
				%	%		isotope ratios											ages (Ma)									isotope ratios				ages (Ma)				isotope ratios									ages (Ma)
spot	U (ppm)	Th (ppm)	206Pb (ppm)	f206_4	f206_8	Th/U	204Pb/206Pb	±err	207Pb/206Pb	±err	206Pb/238U	±err	207Pb/235U	±err	rho	208Pb/232Th	±err	207Pb/206Pb	±err	206Pb/238U	±err	207Pb/235U	±err	% discord.	208Pb/232Th	±err	206Pb/238U	±err	208Pb/232Th	±err	206Pb/238U	±err	208Pb/232Th	±err	207Pb/206Pb	±err	206Pb/238U	±err	207Pb/235U	±err	rho_4cor	208Pb/232Th	±err	207Pb/206Pb	±err	206Pb/238U	±err	207Pb/235U	±err
Sample C1216-7
C12167-1.1	718.05	160.115	33.3542	1.18176	0.85359	0.228753	0.00065658	3.053e-05	0.0589324	0.00035485	0.0536667	0.00046614	0.436078	0.00460884	0.591721	0.0208585	0.00023353	564.7	13	337	2.9	367.5	3.3	8.2	417.2	4.6	0.0532575	0.00048326	0.0207515	0.00022935	334.5	3	415.1	4.5	0.0492534	0.00060282	0.0530233	0.00046152	0.360087	0.00556166	0.405754	0.0149712	0.00030747	159.9	28.4	333.1	2.9	312.3	4.2
C12167-10.1	1766.39	637.384	84.1706	0.139608	-0.129523	0.370173	7.757e-05	1.585e-05	0.0537273	0.00024533	0.0550534	0.00073273	0.407834	0.00573859	0.681035	0.0168606	0.0002311	359.7	10.2	345.5	4.5	347.3	4.1	0.6	337.9	4.6	0.0550236	0.0007536	0.0168447	0.00023187	345.3	4.6	337.6	4.6	0.0525886	0.00034957	0.0549755	0.00073186	0.398626	0.00610314	0.626045	0.01642	0.0001025	311.1	15	345	4.5	340.7	4.5
C12167-11.1	943.26	380.337	44.3402	0.965256	0.900675	0.413643	0.00053629	2.125e-05	0.0602711	0.00054865	0.0543095	0.00058625	0.451325	0.00637292	0.550413	0.0193329	0.00027656	613.3	19.6	340.9	3.6	378.2	4.5	9.8	387	5.5	0.0538132	0.00063084	0.019182	0.00026607	337.9	3.9	384	5.3	0.0523961	0.00064811	0.0537779	0.00058089	0.388514	0.00653212	0.462569	0.0166424	0.00019413	302.7	28	337.7	3.6	333.3	4.8
C12167-12.1	1397.24	691.584	63.5587	0.182176	-0.0889906	0.507766	0.00010122	3.021e-05	0.0545154	0.00014483	0.0525551	0.00107785	0.395037	0.00816949	0.714034	0.0162941	0.00033554	392.5	5.8	330.2	6.6	338	5.9	2.4	326.7	6.7	0.0524409	0.00109576	0.0162613	0.00033316	329.5	6.7	326	6.6	0.0530303	0.00049603	0.052458	0.00107625	0.383565	0.00875852	0.646907	0.0158936	0.00012152	330.1	21	329.6	6.6	329.7	6.5
C12167-13.1	715.651	209.936	33.346	2.49797	2.61418	0.300937	0.00138787	5.735e-05	0.071584	0.00115341	0.0538334	0.00076972	0.531339	0.0114461	0.477892	0.0262056	0.00060248	974.1	32.6	338	4.7	432.7	7.6	21.8	522.8	11.9	0.0525389	0.00083179	0.0257335	0.00056151	330.1	5.1	513.5	11.1	0.0511732	0.00150015	0.0524688	0.00075233	0.37021	0.0121549	0.314438	0.0167151	0.00043128	248.7	66	329.7	4.6	319.8	9
C12167-14.1	4789.21	1893.87	194.848	8.82804	9.30615	0.405672	0.00490484	5.101e-05	0.130752	0.00129533	0.0448527	0.00055026	0.84741	0.0129956	0.575976	0.0359488	0.00063921	2108.1	17.2	282.8	3.4	623.2	7.1	54.6	713.8	12.5	0.0402996	0.00057325	0.0327257	0.00053386	254.7	3.6	650.8	10.4	0.0593514	0.00167345	0.0408074	0.00050239	0.333945	0.0103445	0.286154	0.0134929	0.00047854	580.1	60	257.8	3.1	292.6	7.9
C12167-15.1	276.79	83.868	13.036	0.52404	-0.0646922	0.310839	0.00029116	7.555e-05	0.0529708	0.00032693	0.0544133	0.00047752	0.397416	0.00426379	0.588937	0.0168183	0.00025402	327.5	14	341.6	3	339.8	3.1	-0.6	337.1	5.1	0.0544346	0.00051675	0.0168196	0.00025275	341.7	3.2	337.1	5	0.0486757	0.00123444	0.0541242	0.00048087	0.363252	0.00984871	0.235938	0.0148711	0.00054526	132.3	58.6	339.8	2.9	314.6	7.3
C12167-16.1	753.823	169.939	35.9789	0.462798	0.161574	0.231266	0.00025713	2.609e-05	0.0533498	0.00054469	0.0551427	0.00054237	0.405625	0.0057505	0.499531	0.0180461	0.00033803	343.7	23	346	3.3	345.7	4.1	0	361.5	6.7	0.0551381	0.00058854	0.018053	0.00033117	346	3.6	361.6	6.6	0.0495608	0.00068423	0.0548841	0.00054047	0.37505	0.00650227	0.408959	0.0157043	0.00037308	174.5	31.8	344.4	3.3	323.4	4.8
C12167-17.1	1222.47	574.856	57.4038	0.398991	-0.130416	0.482404	0.00022168	2.129e-05	0.0548322	0.0003143	0.0542516	0.00075296	0.410159	0.00615902	0.665478	0.0167099	0.00024821	405.5	12.6	340.6	4.6	349	4.5	2.4	334.9	4.9	0.0541402	0.0007902	0.0166687	0.00024414	339.9	4.8	334.1	4.9	0.0515737	0.00046017	0.0540322	0.00075021	0.384224	0.00649092	0.591756	0.0157574	0.00012244	266.5	20.4	339.2	4.6	330.1	4.7
C12167-18.1	6179.48	3011	309.356	9.83627	10.6884	0.49986	0.00546501	7.421e-05	0.138368	0.00347154	0.0535822	0.00120454	1.10346	0.03598	0.496396	0.0420611	0.0013692	2206.9	43	336.5	7.4	755	17.5	55.4	832.7	26.6	0.0476845	0.00131521	0.038028	0.00106928	300.3	8.1	754.3	20.8	0.0587531	0.0040685	0.0482206	0.00108645	0.390633	0.0284809	0.222497	0.0165407	0.00101967	557.9	144.4	303.6	6.7	334.8	21
C12167-19.1	1207.61	378.734	56.4599	0.187896	-0.146437	0.321734	0.00010439	1.633e-05	0.0532502	0.00033564	0.0540162	0.00057557	0.396597	0.00490995	0.6197	0.0164328	0.00029682	339.5	14.2	339.1	3.5	339.2	3.6	0	329.4	5.9	0.053993	0.00058669	0.0164272	0.00029233	339	3.6	329.3	5.8	0.051716	0.00042286	0.0539133	0.0005747	0.384437	0.00534748	0.551766	0.0157631	0.00023743	272.9	18.6	338.5	3.5	330.3	3.9
C12167-2.1	1324.11	379.047	61.675	0.208755	-0.0460306	0.293668	0.00011598	4.176e-05	0.052501	0.00023683	0.0538138	0.00066796	0.389553	0.00514472	0.676697	0.016691	0.00022198	307.3	10.2	337.9	4.1	334	3.7	-1.2	334.5	4.4	0.0538622	0.00070164	0.0166989	0.0002242	338.2	4.3	334.7	4.5	0.0507945	0.00069732	0.0536999	0.00066781	0.376093	0.00709725	0.474477	0.0158789	0.00030294	231.5	31.4	337.2	4.1	324.2	5.3
C12167-20.1	1585.17	715.441	71.4469	0.75288	0.580655	0.463008	0.0004183	2.497e-05	0.0589053	0.00049537	0.0520737	0.00057986	0.422939	0.00590174	0.574561	0.0175953	0.00023855	563.7	18.2	327.2	3.5	358.2	4.3	8.6	352.5	4.7	0.0516576	0.00060564	0.0174688	0.00022902	324.7	3.7	350	4.6	0.0527657	0.00063613	0.0516757	0.00057592	0.375961	0.00631962	0.477375	0.0157964	0.00016638	318.7	27.2	324.8	3.5	324.1	4.7
C12167-21.1	1722.08	945.462	77.9035	0.215167	-0.0164844	0.563221	0.00011955	2.845e-05	0.0544529	0.0002318	0.0522652	0.00100022	0.392408	0.00769325	0.702823	0.0163534	0.00031712	389.9	9.4	328.4	6.1	336.1	5.6	2.2	327.8	6.3	0.0521471	0.00101421	0.0163166	0.00031871	327.7	6.2	327.1	6.3	0.0526981	0.00050359	0.052151	0.00099841	0.378933	0.00822236	0.63525	0.0159293	0.00010806	315.9	21.6	327.7	6.1	326.3	6.1
C12167-21.2	503.456	256.036	39.8982	0.0600966	0.38241	0.52171	3.339e-05	2.175e-05	0.0609766	0.00036881	0.0915592	0.00094167	0.769785	0.00918469	0.620631	0.0296351	0.00050222	638.5	12.8	564.8	5.6	579.6	5.2	2.6	590.2	9.8	0.0913117	0.00100037	0.0295777	0.00049851	563.3	5.9	589.1	9.8	0.0604913	0.00050219	0.0915046	0.00094178	0.763203	0.0104603	0.540673	0.0294139	0.00040875	621.3	17.8	564.4	5.5	575.9	6.1
C12167-22.1	855.701	321.723	37.7842	0.328666	-0.0818119	0.385699	0.00018261	4.444e-05	0.0550337	0.00016035	0.051015	0.00079207	0.387107	0.00611526	0.707648	0.0157842	0.00029023	413.7	6.4	320.8	4.9	332.3	4.5	3.4	316.5	5.8	0.0508748	0.00081635	0.0157334	0.00029075	319.9	5	315.5	5.8	0.0523521	0.0007171	0.0508447	0.00079052	0.367016	0.00771917	0.532246	0.0148605	0.00027289	300.9	30.8	319.7	4.8	317.4	5.7
C12167-23.1	1334.21	386.338	59.7408	0.273665	0.0873753	0.297051	0.00015205	1.71e-05	0.0539051	9.915e-05	0.0517317	0.00066102	0.384495	0.00496364	0.712654	0.0165223	0.00030671	367.1	4.2	325.1	4	330.3	3.6	1.6	331.2	6.1	0.0516412	0.00065373	0.0165027	0.00030623	324.6	4	330.8	6.1	0.0516704	0.0002865	0.0515879	0.00065938	0.367531	0.0052893	0.639462	0.0155098	0.00024929	270.9	12.6	324.3	4.1	317.8	3.9
C12167-24.1	397.418	79.0862	18.4109	0.224065	-0.0939594	0.204147	0.00012449	6.448e-05	0.0525651	0.00022515	0.0535225	0.00056933	0.387917	0.0044483	0.667887	0.0162708	0.00031354	310.1	9.8	336.1	3.5	332.8	3.2	-1	326.2	6.2	0.0535517	0.00058375	0.0162764	0.00031299	336.3	3.6	326.3	6.2	0.0507333	0.00103744	0.0534009	0.00057152	0.373548	0.00872612	0.329866	0.0150235	0.0006934	228.7	46.6	335.4	3.5	322.3	6.5
C12167-25.1	825.884	279.713	38.0601	0.247437	0.0450185	0.347443	0.00013748	2.659e-05	0.0528161	0.00061763	0.0532428	0.00051504	0.387732	0.0058844	0.458923	0.0168204	0.00018896	320.9	26.4	334.4	3.2	332.7	4.3	-0.6	337.1	3.7	0.0532575	0.00056404	0.0168246	0.00017974	334.5	3.5	337.2	3.6	0.0507934	0.00074689	0.0531092	0.00051439	0.371947	0.00668504	0.388004	0.0160153	0.0001804	231.5	33.6	333.6	3.2	321.1	5
C12167-26.1	676.38	155.314	31.037	0.371912	-0.018103	0.235563	0.00020663	6.706e-05	0.053887	0.00041682	0.0530151	0.00042817	0.393902	0.004405	0.51999	0.0165315	0.00024139	366.3	17.4	333	2.6	337.2	3.2	1.2	331.4	4.8	0.0529471	0.00045982	0.0165127	0.000235	332.6	2.8	331	4.7	0.0508469	0.0011346	0.052815	0.00043147	0.370277	0.00889941	0.244732	0.014754	0.00061089	233.9	50.8	331.8	2.7	319.9	6.7
C12167-27.1	2315.19	1653.32	103.945	4.04844	4.85257	0.732589	0.00224931	5.304e-05	0.0876233	0.00071761	0.0518713	0.00056959	0.626688	0.00858477	0.577157	0.0226646	0.00028629	1374.3	15.6	326	3.5	494	5.3	34	452.9	5.6	0.0495389	0.00060083	0.0217268	0.00026288	311.7	3.7	434.4	5.2	0.0546878	0.00114539	0.0497369	0.00054847	0.375036	0.00897949	0.331611	0.016571	0.00020151	399.5	46.2	312.9	3.4	323.4	6.7
C12167-27.2	1742.98	734.565	82.7018	0.174706	-0.0451964	0.43234	9.646e-05	2.279e-05	0.0524709	0.0002638	0.054819	0.00063379	0.396601	0.00500009	0.660273	0.0170568	0.00026118	306.1	11.4	344	3.8	339.2	3.7	-1.4	341.8	5.2	0.0548599	0.00064368	0.0170712	0.00026192	344.3	3.9	342.1	5.2	0.0510521	0.00044475	0.0547225	0.00063309	0.385198	0.00574881	0.55813	0.0165896	0.0002016	243.1	20	343.5	3.9	330.9	4.3
C12167-28.1	700.129	311.167	33.188	0.335881	0.175856	0.455936	0.00018546	1.701e-05	0.0516572	0.00021992	0.0547661	0.00039749	0.390074	0.00328229	0.621043	0.0175639	0.00018074	270.3	9.8	343.7	2.4	334.4	2.4	-2.8	351.9	3.6	0.0548763	0.00041116	0.0176048	0.00017511	344.4	2.5	352.7	3.5	0.0489222	0.00034662	0.0545808	0.00039651	0.368172	0.00396491	0.4857	0.0167129	0.0001366	144.1	16.6	342.6	2.4	318.3	2.9
C12167-3.1	2639.52	991.163	116.528	1.72017	1.83934	0.38522	0.00095572	0.00010011	0.0667224	0.00024387	0.0508629	0.00115509	0.469235	0.0107641	0.712791	0.0207954	0.0004822	829.1	7.6	319.8	7.1	390.7	7.5	18.2	416	9.6	0.0499297	0.00115129	0.0204788	0.00047536	314.1	7.1	409.7	9.4	0.0526934	0.00161607	0.0499737	0.00113871	0.36308	0.013934	0.427494	0.0159096	0.00051004	315.7	68.2	314.4	7	314.5	10.4
C12167-4.1	1779.39	720.517	82.8887	2.17287	1.97311	0.415395	0.00120724	3.686e-05	0.0699138	0.00104816	0.0538187	0.00063956	0.518801	0.00992509	0.447249	0.0218766	0.00039918	925.9	30.4	337.9	3.9	424.4	6.7	20.4	437.4	7.9	0.0526532	0.0007002	0.021469	0.0003668	330.8	4.3	429.3	7.3	0.0521817	0.00122376	0.0526322	0.00062651	0.378681	0.0100524	0.322858	0.0158978	0.00034995	293.3	52.8	330.7	3.9	326.1	7.5
C12167-5.1	2376.49	1028.22	106.425	1.08724	0.976646	0.443853	0.00060407	2.627e-05	0.0631976	0.00036383	0.051739	0.00101226	0.45084	0.00919452	0.690717	0.0184439	0.00038294	714.9	12.2	325.2	6.2	377.9	6.5	14	369.4	7.6	0.0510378	0.00102963	0.0182243	0.00037074	320.9	6.3	365	7.4	0.0543488	0.00055558	0.0511677	0.00100139	0.383434	0.00857824	0.629844	0.0157511	0.00015445	385.5	22.8	321.7	6.2	329.6	6.4
C12167-6.1	1105.78	350.974	50.9844	0.803146	0.872925	0.325607	0.00044623	3.967e-05	0.0606453	0.00021224	0.0532693	0.00062482	0.445429	0.00545226	0.689945	0.0195333	0.00029206	626.7	7.6	334.6	3.9	374.1	3.9	10.6	391	5.8	0.0527511	0.00064702	0.0193787	0.00028523	331.4	4	387.9	5.7	0.0541068	0.00066227	0.0528352	0.00062093	0.394167	0.0068378	0.487771	0.016743	0.00029964	375.5	27.4	331.9	3.8	337.4	5
C12167-7.1	1506.36	427.91	67.9561	0.67101	0.655827	0.291416	0.00037281	4.355e-05	0.0597478	0.00022207	0.0521206	0.00082294	0.429374	0.00696476	0.700843	0.0186842	0.00032836	594.5	8	327.5	5	362.7	4.9	9.8	374.1	6.5	0.0516576	0.00083434	0.0185417	0.00032464	324.7	5.1	371.3	6.4	0.0542862	0.00072272	0.0517656	0.00081839	0.387467	0.00812923	0.542544	0.0161347	0.00032716	382.9	29.8	325.4	5.1	332.5	5.9
C12167-8.1	1991.36	627.672	91.2847	0.382778	0.122143	0.323349	0.00021267	8.148e-06	0.0549624	0.00022879	0.0529612	0.0009371	0.401354	0.00729548	0.700866	0.0169949	0.00031003	410.7	9.2	332.7	5.8	342.6	5.3	2.8	340.6	6.2	0.0528328	0.00097353	0.0169554	0.00030918	331.9	6	339.8	6.1	0.0518374	0.00026302	0.0527555	0.00093349	0.377064	0.00707283	0.679201	0.0156634	8.974e-05	278.3	11.6	331.4	5.7	324.9	5.3
C12167-9.1	2130.91	885.818	93.0398	0.387771	0.888332	0.42645	0.00021544	7.552e-06	0.0555129	0.00066588	0.0504445	0.00042336	0.386111	0.00565246	0.412761	0.0178791	0.00018827	432.9	26.6	317.2	2.5	331.5	4.1	4.4	358.1	3.7	0.0502392	0.00044772	0.0178314	0.00017559	316	2.8	357.2	3.5	0.0523491	0.00067899	0.0502457	0.00042174	0.362671	0.00575362	0.380938	0.0169042	0.00011014	300.7	29.4	316	2.6	314.2	4.3
Sample C1216-3
C1216_3-1.1	588.397	134.74	27.327	0.11171	-0.0322217	0.234918	6.161e-05	2.877e-05	0.0536978	0.00067303	0.0536576	0.00062479	0.397276	0.00679651	0.49005	0.0166631	0.00028388	358.5	28	336.9	3.8	339.7	5	0.8	334	5.7	0.0536007	0.00066755	0.0166485	0.00027325	336.6	4.1	333.7	5.4	0.0527935	0.00081099	0.0535972	0.00062472	0.390146	0.00765358	0.427799	0.0161253	0.0003185	319.9	34.6	336.6	3.9	334.5	5.6
C1216_3-1.2	185.832	38.8412	9.02591	3.21365	3.24054	0.214418	0.00177246	0.00066064	0.0795156	0.00837193	0.0561152	0.00099522	0.61523	0.065688	0.119598	0.0347327	0.00525658	1185.1	195	352	6.1	486.9	42.2	27.8	690	102.9	0.0542383	0.00158856	0.0339425	0.00484846	340.5	9.7	674.6	94.6	0.0535253	0.013759	0.0543005	0.00117683	0.400744	0.103389	0.0604833	0.0170112	0.00841887	351.1	495.4	340.9	7.2	342.2	77.9
C1216_3-10.1	2116.74	1003.13	97.3452	0.93216	0.802	0.48616	0.00051412	3.545e-05	0.0601949	0.00043707	0.0531319	0.00049133	0.44098	0.00518476	0.566294	0.0183501	0.00018334	610.7	15.6	333.7	3	370.9	3.6	10	367.5	3.6	0.0526368	0.00052026	0.0181991	0.00017311	330.7	3.2	364.5	3.4	0.0526477	0.00071356	0.0526331	0.00048793	0.38207	0.00642331	0.397024	0.0162023	0.00016361	313.7	30.6	330.7	3	328.6	4.8
C1216_3-11.1	1387.86	398.306	66.4471	2.86307	3.25099	0.294416	0.0015791	9.743e-05	0.0783547	0.00174965	0.0553148	0.00058001	0.5976	0.0147424	0.306036	0.0295332	0.0007437	1155.9	43.6	347.1	3.6	475.7	9.4	27	588.2	14.6	0.0535353	0.00069839	0.0287985	0.00067321	336.2	4.3	573.8	13.2	0.0552493	0.00239124	0.0537206	0.00057182	0.409234	0.0182994	0.17139	0.0181967	0.00097334	422.3	93.8	337.3	3.5	348.3	13.2
C1216_3-11.2	871.386	282.282	38.2421	0.703446	1.07294	0.332324	0.00038798	7.772e-05	0.0595836	0.00028619	0.0507038	0.000505	0.416554	0.00460604	0.648525	0.0191548	0.00023396	588.5	10.4	318.8	3.1	353.6	3.3	9.8	383.5	4.7	0.0502392	0.00051438	0.0190257	0.00022185	316	3.2	380.9	4.4	0.0538971	0.00126032	0.050344	0.00050657	0.374126	0.00961909	0.281778	0.0168903	0.000474	366.7	52	316.6	3.1	322.7	7.1
C1216_3-12.1	855.445	228.298	40.0139	0.19676	-0.029932	0.273778	0.00010852	7.55e-06	0.0529187	0.00044671	0.0540416	0.0005704	0.394313	0.00532926	0.562289	0.0168112	0.00021552	325.3	19	339.3	3.5	337.5	3.9	-0.6	336.9	4.3	0.0540584	0.0006052	0.0168146	0.00020713	339.4	3.7	337	4.1	0.051323	0.00046303	0.0539346	0.00056932	0.381666	0.00547551	0.529763	0.0159927	0.00013148	255.3	20.6	338.6	3.5	328.3	4.1
C1216_3-13.1	2945.65	1503.58	136.885	0.220956	-0.0820707	0.523641	0.00012187	2.342e-05	0.0551405	0.00019387	0.0532103	0.00058564	0.408187	0.00467809	0.691443	0.0166616	0.00022088	417.9	7.8	334.2	3.6	347.6	3.4	3.8	334	4.4	0.0530615	0.00012328	0.0166184	0.00021384	333.3	0.8	333.1	4.3	0.0533531	0.00041596	0.0530919	0.00058478	0.390564	0.00545535	0.56776	0.0160398	0.00015061	343.9	17.6	333.5	3.6	334.8	4
C1216_3-14.1	2754.02	913.547	119.757	2.32143	2.69253	0.340293	0.00128036	4.357e-05	0.0732335	0.00044365	0.0499839	0.00055411	0.50729	0.00638356	0.634295	0.0236494	0.00027317	1020.5	12.2	314.4	3.4	416.6	4.3	24.6	472.4	5.4	0.0486438	0.00031102	0.0231332	0.00025763	306.2	1.9	462.2	5.1	0.0544808	0.00083393	0.0488126	0.00054259	0.366674	0.00706129	0.415593	0.0163315	0.00025711	390.9	34	307.2	3.3	317.2	5.3
C1216_3-14.2	1603.04	735.884	73.6758	0.149398	0.152478	0.470929	8.24e-05	2.953e-05	0.0558868	0.00024473	0.0530996	0.00078445	0.409171	0.00630473	0.690312	0.0169736	0.00025935	447.9	9.6	333.5	4.8	348.3	4.6	4.2	340.2	5.2	0.0528981	0.00079676	0.0169152	0.00025238	332.3	4.9	339	5	0.0546803	0.0005243	0.0530198	0.00078379	0.399736	0.00718942	0.5918	0.0166186	0.0001325	399.1	21.4	333	4.8	341.5	5.3
C1216_3-15.1	2924.91	1483.57	140.641	0.0863783	0.234672	0.520337	4.764e-05	8.197e-06	0.0544169	0.00018173	0.055081	0.00066539	0.416818	0.0051829	0.69949	0.0178807	0.00022126	388.3	7.6	345.6	4	353.8	3.7	2.4	358.2	4.4	0.0549908	0.00020295	0.0178616	0.00022026	345.1	1.2	357.8	4.4	0.0537184	0.00022274	0.0550332	0.00066486	0.407617	0.00540991	0.655394	0.0175362	6.2e-05	359.3	9.4	345.3	4	347.2	4
C1216_3-16.1	1108.33	309.613	50.597	0.477537	0.446194	0.286575	0.00026338	3.402e-05	0.0558539	0.00020384	0.052743	0.00068541	0.406184	0.0054827	0.693185	0.0181736	0.0002648	446.5	8.2	331.3	4.2	346.1	3.9	4.2	364	5.3	0.0525389	0.00069507	0.0181235	0.00026446	330.1	4.3	363	5.3	0.0519844	0.00057354	0.0524893	0.0006829	0.376225	0.00655965	0.537265	0.0163206	0.00026661	284.7	25	329.8	4.2	324.3	4.9
C1216_3-17.1	1664.86	457.393	80.0509	0.0860567	-0.00107993	0.281838	4.746e-05	1.744e-05	0.0538823	0.00013685	0.0555517	0.00054325	0.412713	0.00416987	0.696881	0.0173899	0.00018573	366.1	5.8	348.5	3.3	350.8	3	0.6	348.4	3.7	0.0555147	0.00055692	0.0173782	0.0001823	348.3	3.4	348.2	3.6	0.0531861	0.00030595	0.0555037	0.00054306	0.407028	0.00484729	0.591544	0.0170326	0.00014714	336.7	13	348.2	3.3	346.7	3.5
C1216_3-17.2	1009.94	231.793	38.8501	1.87145	2.48057	0.235447	0.00103218	5.449e-05	0.0674053	0.0002216	0.0444434	0.0004662	0.413053	0.00454067	0.687047	0.0234112	0.0004682	850.3	6.8	280.3	2.9	351.1	3.3	20.2	467.7	9.3	0.0435484	0.00047931	0.0230724	0.00046253	274.8	3	461	9.1	0.052245	0.00089954	0.0436012	0.00045953	0.314086	0.00644085	0.370039	0.0159415	0.00055249	296.1	38.8	275.1	2.8	277.3	4.9
C1216_3-18.1	1475.3	873.621	68.4306	0.605803	0.816167	0.607481	0.00033412	2.484e-05	0.0577825	0.00050954	0.0535896	0.00055489	0.426954	0.00580685	0.548154	0.0181604	0.00020463	521.5	19.2	336.5	3.4	361	4.1	6.8	363.7	4	0.0532575	0.00058377	0.0180631	0.00019617	334.5	3.6	361.8	3.9	0.0528791	0.00064511	0.0532627	0.00055204	0.38834	0.00637226	0.45478	0.017034	0.00011242	323.7	27.4	334.5	3.4	333.2	4.7
C1216_3-19.1	1503.58	622.631	69.101	0.398608	0.400894	0.42481	0.00021985	2.966e-05	0.0568138	0.00012853	0.0530969	0.00048586	0.415936	0.00392058	0.698956	0.0176204	0.00018577	484.3	5	333.5	3	353.1	2.8	5.6	353	3.7	0.0528328	0.00050098	0.0175444	0.00018128	331.9	3.1	351.5	3.6	0.0535903	0.00048414	0.0528837	0.00048476	0.390762	0.0052228	0.493797	0.0165701	0.00016536	353.9	20.2	332.2	3	334.9	3.8
C1216_3-2.1	509.593	218.024	24.2577	0.0992551	0.0238773	0.438904	5.474e-05	4.227e-05	0.0535092	0.00030495	0.0549966	0.00088896	0.40576	0.00695436	0.679032	0.0172819	0.00030046	350.5	12.8	345.1	5.4	345.8	5	0.2	346.3	6	0.0549745	0.00091749	0.0172775	0.00029474	345	5.6	346.2	5.9	0.0527057	0.00072984	0.0549417	0.00088908	0.399267	0.00862472	0.539376	0.0170199	0.00022682	316.1	31.2	344.8	5.4	341.1	6.3
C1216_3-20.1	707.586	168.237	33.4475	5.9294	7.3523	0.243911	0.0032703	9.261e-05	0.109199	0.00201117	0.0546128	0.00058792	0.822275	0.0175415	0.363333	0.0502736	0.00114058	1786.1	33.2	342.8	3.6	609.3	9.8	43.8	991.3	21.9	0.0506629	0.00068681	0.0477239	0.00099373	318.6	4.2	942.2	19.2	0.061735	0.00263842	0.0513486	0.00056045	0.437083	0.0193439	0.177568	0.0222724	0.00127947	664.9	89	322.8	3.4	368.2	13.8
C1216_3-21.1	1313.27	376.678	61.2612	0.544226	0.65324	0.294241	0.00030016	5.394e-05	0.0588074	0.00060004	0.0538939	0.00057846	0.436994	0.00647159	0.521837	0.0192764	0.00040049	559.9	22.2	338.4	3.6	368.1	4.6	8	385.9	8	0.0535026	0.0006299	0.0191618	0.00038897	336	3.9	383.6	7.7	0.0544108	0.00104236	0.0535986	0.00057774	0.402108	0.00895707	0.348407	0.0171756	0.00050749	388.1	42.4	336.6	3.6	343.2	6.5
C1216_3-22.1	1058.69	226.004	48.5924	0.155115	0.598862	0.218996	8.555e-05	2.806e-05	0.0544623	0.00025386	0.0530284	0.00064928	0.398207	0.00521698	0.672888	0.0195506	0.00178712	390.3	10.4	333.1	4	340.3	3.7	2.2	391.3	35.4	0.0529308	0.00068393	0.0195502	0.0018027	332.5	4.2	391.3	35.7	0.0532073	0.00050856	0.0529455	0.00064883	0.388423	0.00619694	0.553048	0.0187588	0.00028506	337.7	21.4	332.6	4	333.2	4.5
C1216_3-23.1	1443.61	561.875	66.7563	0.108701	0.108503	0.399281	5.995e-05	1.445e-05	0.054047	0.0002386	0.0534259	0.0007393	0.398133	0.00578283	0.685939	0.0170254	0.00025993	373.1	9.8	335.5	4.5	340.3	4.2	1.4	341.2	5.2	0.0533556	0.00076852	0.0170058	0.00025945	335.1	4.7	340.8	5.2	0.0531674	0.00032932	0.0533675	0.00073862	0.391225	0.00609758	0.639362	0.0167189	0.00012963	335.9	14	335.2	4.6	335.3	4.5
C1216_3-23.2	843.118	183.417	39.7708	0.183264	0.0475524	0.223172	0.00010108	2.514e-05	0.0545163	0.00024087	0.0544986	0.00057899	0.409653	0.00471349	0.664798	0.017305	0.00023596	392.5	9.8	342.1	3.6	348.6	3.4	1.8	346.7	4.6	0.0544019	0.00059829	0.0172775	0.00023322	341.5	3.7	346.2	4.6	0.0530333	0.00046257	0.0543981	0.00057846	0.397774	0.00565562	0.53849	0.016362	0.00027396	330.3	19.6	341.5	3.6	340	4.1
C1216_3-24.1	585.799	242.022	27.299	0.0361466	0.346581	0.423834	1.994e-05	7.833e-05	0.0542119	0.00032458	0.0538403	0.00169921	0.402445	0.0129278	0.707383	0.0177303	0.0008996	379.9	13.4	338.1	10.4	343.4	9.4	1.6	355.2	17.9	0.0537641	0.00173889	0.0177155	0.00089928	337.6	10.7	354.9	17.9	0.0539197	0.00127021	0.0538208	0.00170033	0.40013	0.0158344	0.574799	0.0176336	0.00079546	367.7	52.2	337.9	10.4	341.7	11.5
C1216_3-25.1	966.977	225.276	45.0704	0.22896	0.0246549	0.238994	0.00012628	1.35e-05	0.0542034	0.0003049	0.0538499	0.00061958	0.402454	0.0051543	0.646834	0.0169826	0.0002952	379.5	12.6	338.1	3.8	343.4	3.7	1.6	340.3	5.8	0.0537641	0.00063346	0.0169554	0.0002972	337.6	3.9	339.8	5.9	0.0523489	0.00037193	0.0537258	0.0006183	0.387789	0.00542796	0.591977	0.0158954	0.00024569	300.7	16.2	337.4	3.8	332.8	4
C1216_3-26.1	1371.55	582.467	64.7351	0.31586	0.128087	0.43566	0.00017421	1.22e-05	0.0550065	0.00046875	0.0545301	0.00040741	0.413575	0.00468713	0.474652	0.0173935	0.00013957	412.5	19	342.3	2.5	351.4	3.3	2.6	348.5	2.8	0.0544018	0.00044425	0.0173581	0.00012968	341.5	2.7	347.8	2.6	0.0524485	0.00050783	0.0543568	0.0004063	0.39309	0.00501278	0.422021	0.0165605	7.146e-05	305.1	21.8	341.2	2.5	336.6	3.6
C1216_3-27.1	1312.67	376.112	44.8797	1.02108	2.32136	0.293934	0.00056316	7.869e-05	0.0606063	0.00045283	0.0395005	0.00028068	0.330084	0.00340353	0.496183	0.0186684	0.0002502	625.3	16	249.7	1.7	289.6	2.6	13.8	373.8	5	0.0390094	0.00029088	0.0185065	0.00024074	246.7	1.8	370.6	4.8	0.0523356	0.00132808	0.039091	0.0002836	0.282084	0.00751417	0.196095	0.0157626	0.00045558	300.1	56.8	247.2	1.8	252.3	6
C1216_3-28.1	646.002	226.351	29.2522	0.533333	0.147941	0.359449	0.00029415	1.132e-05	0.0568817	0.00071731	0.052316	0.00061477	0.41031	0.00707248	0.49085	0.0168241	0.00029561	486.9	27.6	328.7	3.7	349.1	5.1	5.8	337.2	5.9	0.0520328	0.00065948	0.0167441	0.00027996	327	4	335.6	5.6	0.0525632	0.0007429	0.0520349	0.00061156	0.377121	0.00706417	0.451748	0.0151873	0.00022522	310.1	31.8	327	3.7	324.9	5.2
C1216_3-29.1	1096.2	347.016	49.9073	0.147046	-0.0567825	0.324749	8.11e-05	1.523e-05	0.0539756	0.0005972	0.0525997	0.00059393	0.391458	0.00618844	0.514263	0.0163028	0.00019505	370.1	24.6	330.5	3.7	335.4	4.5	1.4	326.8	3.9	0.0525389	0.00064898	0.0162764	0.00018628	330.1	4	326.3	3.7	0.0527853	0.0006441	0.0525218	0.00059323	0.382258	0.00650367	0.477982	0.0158007	0.00010848	319.5	27.6	330	3.6	328.7	4.8
C1216_3-3.1	1357.85	429.476	61.0074	1.56352	1.55086	0.324471	0.00086234	9.151e-05	0.0650966	0.00038875	0.0519087	0.00075733	0.465911	0.00734488	0.66634	0.0212099	0.000519	777.5	12.4	326.2	4.6	388.4	5.1	16	424.2	10.3	0.0510867	0.00078454	0.0209384	0.00050741	321.2	4.8	418.8	10	0.0524342	0.00150967	0.0510905	0.00075043	0.369368	0.0120128	0.325178	0.0159339	0.00060721	304.5	64.2	321.2	4.6	319.2	9
C1216_3-3.2	3579.15	2647.65	156.956	1.81892	2.2133	0.758874	0.0010032	4.101e-05	0.0703851	0.00057218	0.0495714	0.00058725	0.491691	0.00696107	0.602473	0.0186366	0.00025835	939.7	16.4	311.9	3.6	406.1	4.8	23.2	373.2	5.1	0.0484324	0.00045524	0.0182394	0.0002422	304.9	2.8	365.3	4.8	0.0557145	0.00087679	0.0486611	0.00057766	0.373813	0.00749104	0.426517	0.0157261	0.0001708	441.1	34.6	306.3	3.6	322.5	5.6
C1216_3-30.1	1706.85	512.745	77.7614	0.0960003	-0.0448786	0.308172	5.295e-05	1.634e-05	0.0538954	0.00020501	0.0526353	0.00077482	0.391141	0.00594694	0.697103	0.0163439	0.00026543	366.7	8.6	330.7	4.8	335.2	4.3	1.4	327.6	5.2	0.0525715	0.00079424	0.0163216	0.00026251	330.3	4.9	327.2	5.2	0.0531186	0.00032839	0.0525844	0.00077423	0.385131	0.00630491	0.647554	0.0159982	0.00015371	333.9	14	330.4	4.8	330.8	4.6
C1216_3-30.2	795.504	276.939	33.9002	0.317147	0.586836	0.357133	0.00017492	1.916e-05	0.054589	0.00019047	0.0492345	0.0009166	0.370577	0.00701917	0.707679	0.0170496	0.00034504	395.5	7.8	309.8	5.6	320.1	5.2	3.2	341.7	6.9	0.0490994	0.00092949	0.0170209	0.00034357	309	5.7	341.1	6.8	0.0520192	0.0003567	0.0490769	0.00091383	0.352002	0.00709907	0.664759	0.0161267	0.00015227	286.3	15.6	308.9	5.7	306.2	5.3
C1216_3-31.1	925.487	525.572	43.6203	0.207134	-0.0827877	0.582574	0.00011424	1.694e-05	0.0546381	0.00047934	0.0544538	0.00065423	0.410231	0.00610285	0.581477	0.0169089	0.00023217	397.5	19.6	341.8	4	349	4.4	2	338.9	4.6	0.0543528	0.00070198	0.0168749	0.00022583	341.2	4.3	338.2	4.5	0.0529617	0.00054911	0.0543403	0.00065309	0.396815	0.00645893	0.53163	0.0165009	0.00011743	327.1	23.4	341.1	4	339.3	4.7
C1216_3-4.1	632.573	223.273	53.7717	35.9445	38.0646	0.362088	0.0198248	0.00127602	0.346939	0.0108705	0.0982093	0.00158551	4.69797	0.16559	0.32978	0.234777	0.00901251	3693.7	46.8	603.9	9.3	1766.9	30	65.8	4262.1	148	0.0614257	0.00236956	0.23538	0.00901936	384.3	14.4	4272	147	0.057789	0.0355557	0.0628621	0.0024912	0.500886	0.308822	0.0462788	0.0299285	0.0155498	521.7	973.2	393	15.1	412.3	233.9
C1216_3-5.1	919.95	297.593	41.6211	0.159319	0.149839	0.331854	8.787e-05	5.019e-05	0.0548931	0.00026368	0.0522708	0.0006055	0.395622	0.00496123	0.665084	0.0168531	0.0002144	407.9	10.6	328.4	3.7	338.5	3.6	3	337.8	4.3	0.0521308	0.00063022	0.0168146	0.00020769	327.6	3.9	337	4.1	0.0536047	0.00083092	0.0521869	0.00060642	0.385717	0.00760073	0.424579	0.016324	0.00031498	354.5	34.6	327.9	3.7	331.2	5.5
C1216_3-5.2	1459.23	436.343	69.5604	0.211823	0.0125501	0.306757	0.00011683	4.899e-06	0.0542721	0.00021308	0.0550742	0.00083691	0.412125	0.00646831	0.697109	0.0172922	0.00027142	382.3	8.8	345.6	5.1	350.4	4.7	1.4	346.5	5.4	0.0550072	0.00086963	0.0172725	0.00026598	345.2	5.3	346.1	5.3	0.0525569	0.00022697	0.0549569	0.00083514	0.39825	0.00645334	0.675214	0.0164911	5.434e-05	309.7	9.8	344.9	5.1	340.4	4.7
C1216_3-6.1	400.776	76.703	17.9702	1.22757	0.829782	0.196336	0.00067705	9.292e-05	0.0601415	0.00052227	0.0518038	0.00100658	0.429576	0.0091426	0.657337	0.0206838	0.00052529	608.7	18.6	325.6	6.2	362.9	6.5	10.2	413.8	10.4	0.051315	0.00104095	0.0205445	0.00051303	322.6	6.4	411	10.2	0.0501719	0.00156618	0.0511627	0.000998	0.353931	0.0130905	0.379731	0.013852	0.00099478	202.9	71	321.7	6.2	307.7	9.9
C1216_3-6.2	875.16	261.171	37.5223	1.43288	1.28016	0.306145	0.00079029	4.462e-05	0.0650586	0.00054079	0.0495349	0.00114431	0.444345	0.0109091	0.677477	0.0196739	0.00050216	776.3	17.4	311.7	7.1	373.3	7.7	16.6	393.8	10	0.0487414	0.00118157	0.0194039	0.00048451	306.8	7.3	388.4	9.6	0.0534691	0.00089706	0.0488184	0.00112848	0.359907	0.0103614	0.578115	0.01478	0.00033168	348.7	37.6	307.3	7	312.1	7.7
C1216_3-7.1	2663.49	1681.44	119.36	0.44005	0.0717959	0.647618	0.00024271	2.231e-05	0.0576389	0.00043236	0.0516053	0.00094586	0.411468	0.00812605	0.668226	0.0163407	0.000336	516.1	16.4	324.4	5.8	349.9	5.8	7.2	327.6	6.7	0.0512824	0.00081387	0.0162412	0.00032482	322.4	5	325.6	6.5	0.0540824	0.00055859	0.0513764	0.0009419	0.38311	0.0081791	0.618291	0.0155477	0.00012996	374.5	23	323	5.8	329.3	6
C1216_3-8.1	2167.65	732.46	104.869	5.12129	6.41399	0.346644	0.0028246	0.00025706	0.104522	0.00270121	0.0558941	0.00210785	0.805526	0.0368261	0.593921	0.0380102	0.00184932	1705.9	46.8	350.6	12.9	599.9	20.9	41.6	754	36.1	0.052196	0.00216451	0.0359756	0.00165842	328	13.3	714.3	32.3	0.0636246	0.00511685	0.0530114	0.00201628	0.465049	0.0414061	0.307572	0.020603	0.00195481	729.1	162	333	12.4	387.8	29.1
C1216_3-9.1	1258.57	459.37	58.4916	0.181457	0.103463	0.374432	0.00010008	2.446e-05	0.0536912	0.00031238	0.0536939	0.00076448	0.397495	0.00611371	0.666497	0.0171156	0.00031529	358.1	13.2	337.2	4.7	339.8	4.4	0.8	343	6.3	0.0536497	0.00078729	0.0171064	0.0003094	8	4.8	342.8	6.2	0.0522213	0.00049539	0.0535958	0.00076346	0.385907	0.00674953	0.586401	0.0165672	0.00023813	295.1	21.6	336.6	4.7	331.4	5
C1216_1-1-1	1850.37	717.276	85.6093	0.418201	0.177456	0.397663	0.0002309	6.691e-05	0.0555827	0.00046212	0.0534529	0.00038251	0.409652	0.00449374	0.469695	0.0172172	0.00013953	435.7	18.4	335.7	2.4	348.6	3.2	3.8	345	2.8	0.0532739	0.00041746	0.0171668	0.00012955	334.6	2.6	344	2.6	0.0521913	0.00115063	0.0532276	0.00038646	0.383035	0.00899735	0.222548	0.0160311	0.0003481	293.9	49.4	334.3	2.4	329.3	6.7
Sample C1216-2
C1216_2-1.1	819.794	997.705	37.7119	0.267847	-0.28386	1.24849	0.00014773	3.286e-05	0.0550473	0.00030156	0.0531476	0.00071679	0.403389	0.00587213	0.667069	0.0164492	0.00029183	414.1	12.2	333.8	4.4	344.1	4.3	3	329.7	5.8	0.0529961	0.00073025	0.0164021	0.0002886	332.9	4.5	328.8	5.7	0.0528794	0.00059833	0.0530042	0.00071557	0.386457	0.00694856	0.540605	0.0162088	0.00019098	323.7	25.4	332.9	4.3	331.8	5.1
C1216_2-10.1	541.037	618.066	24.5997	0.323683	-0.392661	1.17192	0.00017852	1.599e-05	0.0514454	0.00059055	0.0525306	0.00142944	0.372618	0.0110048	0.66339	0.0161612	0.00045652	260.9	26.2	330	8.7	321.6	8.2	-2.6	324	9.1	0.0526205	0.00147208	0.0161859	0.00045203	330.6	9	324.5	9	0.0488123	0.00064361	0.0523593	0.00142487	0.352393	0.0107316	0.643392	0.0158553	0.00011218	138.9	30.6	329	8.7	306.5	8.1
C1216_2-11.1	2469.14	431.53	115.182	0.0987886	-0.23165	0.179289	5.449e-05	8.027e-06	0.0537721	0.00023285	0.0538949	0.00059382	0.399585	0.00473047	0.670105	0.0154682	0.0004245	361.5	9.8	338.4	3.6	341.3	3.4	0.8	310.2	8.4	0.0538459	0.00061178	0.015442	0.0004206	338.1	3.7	309.7	8.4	0.0529726	0.00026492	0.0538413	0.00059328	0.393252	0.00496542	0.628337	0.0148424	0.00039944	327.7	11.2	338.1	3.7	336.7	3.6
C1216_2-12.1	603.805	600.996	27.8194	0.115086	-0.124579	1.02109	6.347e-05	3.19e-05	0.05317	0.00018891	0.0532304	0.00053709	0.390239	0.00417443	0.679125	0.016565	0.00019565	336.1	8	334.3	3.3	334.5	3	0	332	3.9	0.0532085	0.00054943	0.016558	0.00019764	334.2	3.4	331.9	3.9	0.0522377	0.00053495	0.0531688	0.00053736	0.382952	0.00568033	0.490582	0.0164385	0.00011378	295.9	23.2	333.9	3.2	329.2	4.2
C1216_2-13.1	1224.17	1010.22	55.7809	0.609829	0.404546	0.846569	0.00033635	3.43e-05	0.05792	0.00019799	0.0526445	0.00093153	0.420422	0.00757676	0.70693	0.0169595	0.00032221	526.7	7.6	330.7	5.7	356.4	5.5	7.2	339.9	6.4	0.052294	0.00094149	0.0168548	0.00032124	328.6	5.8	337.8	6.4	0.0529846	0.00057643	0.0523211	0.00092639	0.382235	0.00806193	0.604423	0.01616	0.00013801	328.1	24.6	328.8	5.7	328.7	6
C1216_2-14.1	681.628	450.048	30.3021	0.850426	0.283572	0.677329	0.00046904	5.156e-05	0.0557817	0.00040727	0.0513611	0.00057395	0.395031	0.00527305	0.602755	0.0165078	0.00021483	443.7	16.2	322.9	3.5	338	3.8	4.4	330.9	4.3	0.0511682	0.00061089	0.0164473	0.00020481	321.7	3.8	329.7	4.1	0.0488639	0.00091251	0.0509207	0.00057108	0.343073	0.00757496	0.365716	0.0151475	0.0001837	141.3	43.2	320.2	3.5	299.5	5.7
C1216_2-15.1	1538.38	2154.08	70.1138	0.189502	-0.510596	1.43644	0.00010452	1.615e-05	0.0539617	0.00015898	0.0526562	0.00077392	0.391777	0.00587271	0.705957	0.0161962	0.00026561	369.5	6.6	330.8	4.7	335.7	4.3	1.4	324.7	5.3	0.0525878	0.00078882	0.0161708	0.00026587	330.4	4.8	324.2	5.3	0.052427	0.00029942	0.0525557	0.0007726	0.379908	0.00614609	0.654251	0.0160497	3.914e-05	304.1	13	330.2	4.7	327	4.6
C1216_2-16.1	648.122	548.572	29.183	0.133055	-0.00420699	0.868292	7.339e-05	2.205e-05	0.0539078	0.00034357	0.0520215	0.00176676	0.386669	0.0133613	0.707648	0.016303	0.00055874	367.3	14.2	326.9	10.8	331.9	9.8	1.6	326.8	11.1	0.0519512	0.00181212	0.0162814	0.00055521	326.5	11.1	326.4	11	0.0528308	0.00048793	0.0519518	0.00176451	0.378436	0.0133898	0.691155	0.0161349	8.698e-05	321.5	21	326.5	10.8	325.9	9.9
C1216_2-17.1	827.113	823.804	37.0197	0.426335	0.246926	1.02176	0.00023514	1.921e-05	0.0552831	0.00017716	0.0517104	0.00102023	0.394162	0.00787861	0.710687	0.0164334	0.00034108	423.7	7.2	325	6.2	337.4	5.7	3.6	329.4	6.8	0.0515434	0.00103406	0.016382	0.00034219	324	6.3	328.4	6.8	0.0518278	0.00035086	0.0514882	0.00101601	0.367938	0.00778966	0.671087	0.0159783	0.00010394	277.9	15.4	323.7	6.3	318.1	5.8
C1216_2-18.1	482.265	290.778	22.0734	0.619499	-0.122365	0.618536	0.00034168	6.928e-05	0.0542195	0.00032572	0.0528802	0.00127411	0.395324	0.00981662	0.698613	0.0163737	0.00042573	380.1	13.6	332.2	7.8	338.3	7.2	1.8	328.2	8.4	0.0528001	0.00130987	0.0163417	0.00042752	331.7	8	327.6	8.5	0.0491822	0.00114032	0.0525502	0.00126792	0.356358	0.0119936	0.516165	0.0152571	0.00025697	156.5	53.4	330.2	7.8	309.5	9
C1216_2-19.1	870.864	985.303	39.2621	0.0867483	-0.352466	1.16067	4.785e-05	5.343e-05	0.0519397	0.00078001	0.0520875	0.00075294	0.373025	0.00777543	0.499313	0.0160549	0.00028878	282.7	34	327.3	4.6	321.9	5.8	-1.6	321.9	5.7	0.0521471	0.00081416	0.0160702	0.00027847	327.7	5	322.2	5.5	0.0512362	0.00114527	0.052042	0.000754	0.36765	0.00988257	0.388074	0.0159728	0.00016725	251.5	50.6	327	4.6	317.9	7.4
C1216_2-2.1	698.997	508.513	32.3601	0.328261	-0.00971704	0.746305	0.00018105	1.954e-05	0.0547743	0.00053108	0.0534865	0.00069252	0.403948	0.00653405	0.576317	0.0167458	0.00023117	403.1	21.6	335.9	4.2	344.5	4.7	2.4	335.6	4.6	0.0533719	0.00074288	0.0167089	0.00022281	335.2	4.6	334.9	4.4	0.0521149	0.00061506	0.0533097	0.00069049	0.383065	0.00685303	0.521283	0.01625	8.356e-05	290.5	26.8	334.8	4.2	329.3	5.1
C1216_2-20.1	1054.9	1190.36	48.0666	0.124294	-0.57384	1.1576	6.855e-05	2.621e-05	0.0541991	0.00027364	0.0526433	0.00085242	0.393404	0.00667267	0.687362	0.0160484	0.00029476	379.3	11.4	330.7	5.2	336.9	4.9	1.8	321.8	5.9	0.0525552	0.00088015	0.0160199	0.00028805	330.2	5.4	321.2	5.7	0.0531934	0.00049423	0.0525774	0.00085173	0.385621	0.00733444	0.613239	0.0159293	0.000117	337.1	20.8	330.3	5.2	331.2	5.4
C1216_2-21.1	428.116	374.735	19.1002	0.442764	-0.541704	0.897949	0.0002442	3.5e-05	0.0538398	0.00044804	0.0515448	0.00052349	0.382642	0.00502408	0.556918	0.0155983	0.0001784	364.3	18.8	324	3.2	329	3.7	1.6	312.8	3.5	0.0514781	0.00055621	0.0155726	0.00016892	323.6	3.4	312.3	3.4	0.0502443	0.00071133	0.0513148	0.00052219	0.355495	0.00632932	0.411527	0.0150623	0.00010609	206.3	32.6	322.6	3.2	308.8	4.7
C1216_2-21.2	640.397	753.021	29.9588	0.108425	0.0849444	1.20628	5.98e-05	2.104e-05	0.0527803	0.00024069	0.0540487	0.00061862	0.393334	0.00484609	0.668864	0.016997	0.00021293	319.3	10.4	339.3	3.8	336.8	3.5	-0.8	340.6	4.2	0.0540584	0.00062995	0.0170058	0.00020922	339.4	3.9	340.8	4.2	0.0519016	0.0004086	0.0539897	0.00061829	0.386364	0.00554703	0.574313	0.0168947	8.996e-05	281.1	18	339	3.8	331.7	4.1
C1216_2-22.1	391.584	279.341	18.3959	0.126926	-0.209326	0.73181	7e-05	4.422e-05	0.052483	0.00038724	0.0542757	0.00092284	0.392761	0.00727971	0.660491	0.0167128	0.00029601	306.5	16.8	340.7	5.6	336.4	5.3	-1.2	335	5.9	0.0543201	0.00095252	0.016724	0.00028984	341	5.8	335.2	5.8	0.0514539	0.00079479	0.0542064	0.0009227	0.384568	0.00894767	0.526751	0.0165144	0.00014464	261.3	35	340.3	5.6	330.4	6.6
C1216_2-22.2	519.919	412.359	23.37	0.113225	-0.0741963	0.813633	6.245e-05	9.391e-05	0.0530011	0.00086159	0.0519317	0.00081689	0.379509	0.00858474	0.500677	0.016193	0.00035307	328.9	36.4	326.4	5	326.7	6.4	0	324.6	7	0.0519186	0.00088692	0.0161859	0.00034008	326.3	5.4	324.5	6.8	0.0520837	0.00170721	0.0518725	0.00082081	0.372515	0.013625	0.311489	0.0160406	0.00033452	289.1	73.2	326	5	321.5	10.1
C1216_2-23.1	469.139	342.229	21.8687	0.164981	0.00117672	0.748349	9.099e-05	5.206e-05	0.0533393	0.00044005	0.0538555	0.00051158	0.396079	0.00498331	0.543605	0.016874	0.00017724	343.3	18.6	338.1	3.1	338.8	3.6	0.2	338.2	3.5	0.0538295	0.00053624	0.0168699	0.00016623	338	3.3	338.1	3.3	0.0520024	0.00092846	0.0537661	0.00051329	0.385511	0.00792793	0.334245	0.0166238	0.00016171	285.5	40.4	337.6	3.1	331.1	5.8
C1216_2-23.2	865.972	376.584	40.4384	2.19619	1.94784	0.446115	0.00121129	6.047e-05	0.0695364	0.00056682	0.0539511	0.00056738	0.51727	0.00688268	0.569071	0.0215012	0.00031507	914.7	16.6	338.7	3.4	423.3	4.6	20	429.9	6.2	0.0528001	0.00059395	0.0211051	0.00029658	331.7	3.6	422.1	5.9	0.051735	0.00112907	0.0527577	0.00055802	0.376335	0.00922721	0.310599	0.0159019	0.00035531	273.7	49.2	331.4	3.4	324.3	6.8
C1216_2-24.1	547.268	318.588	24.4106	0.287954	-0.313557	0.597198	0.00015882	7.771e-05	0.0533043	0.00067091	0.0515334	0.00180255	0.378752	0.0140797	0.677474	0.0156423	0.00070855	341.7	28.4	323.9	11	326.1	10.4	0.6	313.7	14.1	0.0514944	0.00186293	0.0156279	0.00069783	323.7	11.4	313.4	13.9	0.0509681	0.00139435	0.0513838	0.0017988	0.361101	0.0160961	0.565456	0.0151183	0.00029028	239.5	61.8	323	11	313	12
C1216_2-25.1	115.256	48.8784	5.19913	1.40555	0.538896	0.435054	0.00077522	0.0001718	0.0574852	0.00078313	0.0521167	0.0006353	0.413083	0.00755146	0.480109	0.0175995	0.00046711	510.3	29.6	327.5	3.9	351.1	5.4	6.8	352.6	9.3	0.0518044	0.0006834	0.0175091	0.00045171	325.6	4.2	350.8	9	0.0460112	0.00284305	0.0513783	0.00064732	0.325948	0.0205884	0.143614	0.0140483	0.0008861	0	140.9	323	4	286.5	15.9
C1216_2-26.1	213.887	168.802	9.7298	0.620735	0.147866	0.809619	0.00034236	9.054e-05	0.0562839	0.00122913	0.0525568	0.00046903	0.407866	0.00962203	0.272367	0.0166491	0.00028258	463.7	47.6	330.2	2.9	347.3	6.9	5	333.7	5.6	0.0523266	0.00055052	0.0165781	0.00025797	328.8	3.4	332.3	5.1	0.0512495	0.00188889	0.0522281	0.00047413	0.369061	0.014072	0.171424	0.0157995	0.0003263	252.1	82.6	328.2	2.9	319	10.5
C1216_2-3.1	807.8	762.87	37.4378	0.359189	0.358682	0.968803	0.00019811	1.437e-05	0.0550062	6.089e-05	0.0535447	0.00062303	0.406099	0.00474661	0.716763	0.0171318	0.00023596	412.5	2.4	336.2	3.8	346.1	3.5	2.8	343.3	4.7	0.0534046	0.00063153	0.0170913	0.00023616	335.4	3.9	342.5	4.7	0.0520961	0.00023418	0.0533511	0.00062094	0.383224	0.00497698	0.645244	0.0167133	0.00012836	289.7	10.2	335.1	3.8	329.4	3.7
C1216_2-3.2	1637.79	631.288	77.4761	1.70616	1.45917	0.395419	0.00094102	0.0002032	0.0664517	0.00228938	0.0546535	0.00064731	0.500759	0.0182431	0.234078	0.0210875	0.0009086	820.7	70.2	343	3.9	412.2	12.4	16.8	421.7	17.9	0.0537151	0.00080544	0.0207768	0.00084514	337.3	4.9	415.6	16.7	0.0526378	0.00399027	0.0537148	0.00066771	0.389849	0.0299806	0.11638	0.0161176	0.00138502	313.3	163.8	337.3	4.1	334.3	22.2
C1216_2-4.1	1631.82	638.686	78.4072	4.98714	5.40164	0.401517	0.00275061	0.00013645	0.0960309	0.00070793	0.0555127	0.00070828	0.735034	0.0108311	0.62342	0.0320668	0.00046775	1548.3	13.8	348.3	4.3	559.5	6.4	37.8	637.9	9.2	0.0524572	0.0007261	0.0305817	0.00042638	329.6	4.5	608.8	8.4	0.055812	0.00237201	0.0527243	0.00068678	0.405735	0.0180947	0.210295	0.0175308	0.00074851	444.9	91.8	331.2	4.2	345.8	13.2
C1216_2-5.1	365.129	245.832	16.8355	0.409564	-0.0339596	0.690686	0.00022589	9.414e-05	0.0543187	0.00043208	0.0532707	0.00082476	0.398972	0.00694461	0.64042	0.0166432	0.00026888	384.3	17.8	334.6	5.1	340.9	5.1	1.8	333.6	5.4	0.0531922	0.00087845	0.0166133	0.00026357	334.1	5.4	333	5.2	0.0509959	0.00154331	0.053051	0.00082644	0.373021	0.0127678	0.327695	0.0159774	0.0002855	240.7	68.2	333.2	5	321.9	9.5
C1216_2-5.2	1194.24	1255.48	54.0645	0.544702	0.120304	1.07847	0.00030043	3.359e-05	0.0584791	0.00044854	0.0523036	0.00091722	0.421732	0.0080722	0.659662	0.0164967	0.00029886	547.7	16.8	328.6	5.6	357.3	5.8	8	330.7	6	0.0519186	0.00094154	0.0163769	0.00029289	326.3	5.8	328.3	5.8	0.0540768	0.00069538	0.0520165	0.00091275	0.387843	0.00855251	0.572939	0.0159397	9.512e-05	374.3	28.6	326.9	5.6	332.8	6.3
C1216_2-6.1	361.678	144.549	16.5989	0.316252	-0.0615352	0.409999	0.00017443	6.259e-05	0.0548658	0.00061274	0.0530235	0.00059203	0.40112	0.00633456	0.509058	0.0164601	0.00021801	406.7	24.8	333.1	3.7	342.5	4.6	2.8	330	4.4	0.0528981	0.00064785	0.0164222	0.00020057	332.3	4	329.2	4	0.0523042	0.00116019	0.0528546	0.00059325	0.381175	0.00957502	0.321715	0.0155979	0.00032599	298.7	49.8	332	3.6	327.9	7.1
C1216_2-7.1	753.328	935.094	34.2462	0.19761	0.201588	1.27339	0.00010899	3.95e-05	0.0536975	0.00023779	0.0525216	0.00072223	0.388863	0.0056177	0.68534	0.0166027	0.00024895	358.3	10	330	4.4	333.5	4.1	1	332.8	5	0.0524736	0.00075736	0.0165882	0.00024331	329.7	4.6	332.5	4.8	0.0520965	0.00066433	0.0524171	0.00072178	0.376518	0.0071956	0.518783	0.0164308	9.653e-05	289.7	28.8	329.3	4.4	324.5	5.3
C1216_2-8.1	697.234	233.982	29.71	0.320626	-0.0414088	0.344265	0.00017684	3.165e-05	0.0539222	0.00037903	0.0492304	0.00104584	0.36602	0.00819028	0.683553	0.0153294	0.0003524	367.9	15.6	309.8	6.4	316.7	6.1	2.2	307.5	7.1	0.0491319	0.00107909	0.0153013	0.00034529	309.2	6.6	306.9	6.9	0.0513219	0.00062632	0.0490711	0.00104285	0.347242	0.00860133	0.617725	0.0143616	0.0002034	255.3	27.8	308.8	6.4	302.6	6.5
C1216_2-9.1	687.378	708.219	31.1699	0.0583539	0.131091	1.05697	3.218e-05	4.457e-05	0.053484	0.00043369	0.0523902	0.00089024	0.386347	0.00727416	0.649806	0.0165358	0.00031624	349.3	18.4	329.2	5.5	331.7	5.3	0.8	331.5	6.3	0.0523593	0.00094255	0.0165278	0.00030405	329	5.8	331.3	6	0.0530117	0.00082267	0.0523594	0.00089074	0.382711	0.00892001	0.525524	0.0164748	0.00011132	329.3	34.8	329	5.5	329	6.5
Sample C1216-1
C1216_1-10.1	1765.29	784.542	77.8092	0.602837	-0.00045346	0.455921	0.00033284	0.00010439	0.0536869	0.00023186	0.0509243	0.00071555	0.376962	0.00554132	0.688224	0.0159684	0.00025799	357.9	9.8	320.2	4.4	324.8	4.1	1.4	320.2	5.2	0.0508585	0.00073282	0.0159496	0.00025164	319.8	4.5	319.8	5	0.0487774	0.00166199	0.0506144	0.0007178	0.340405	0.012623	0.275357	0.0145463	0.00046355	137.1	78.2	318.3	4.4	297.5	9.6
C1216_1-11.1	2296.91	1853.59	103.753	0.245172	-0.316719	0.82786	0.00013537	2.697e-05	0.053161	0.00013087	0.0521872	0.00081958	0.382526	0.00608077	0.711314	0.0159932	0.00026246	335.7	5.6	327.9	5	328.9	4.5	0.4	320.7	5.3	0.0521634	0.00083007	0.0159847	0.00026082	327.8	5.1	320.5	5.2	0.0511703	0.00044343	0.0520581	0.00081795	0.367291	0.00672226	0.618114	0.0156669	9.763e-05	248.5	19.8	327.1	5	317.6	5
C1216_1-12.1	666.863	421.362	29.2031	0.213522	-0.00354186	0.648198	0.00011789	5.817e-05	0.053172	0.00041656	0.0505943	0.00066666	0.370927	0.00568615	0.618875	0.0158623	0.00028831	336.1	17.8	318.2	4.1	320.3	4.2	0.6	318.1	5.8	0.0505651	0.00070424	0.0158541	0.00028152	318	4.3	317.9	5.6	0.0514388	0.0010044	0.0504852	0.00066739	0.358063	0.00854131	0.39901	0.0155104	0.00026152	260.5	44.2	317.5	4.1	310.8	6.4
C1216_1-13.1	1013.45	906.968	45.9525	0.15223	-0.137771	0.91808	8.405e-05	4.993e-05	0.052942	0.00050456	0.0523864	0.00073305	0.382405	0.00647424	0.595087	0.0162783	0.00026705	326.3	21.6	329.2	4.5	328.8	4.8	-0.2	326.3	5.3	0.0523919	0.00078914	0.0162713	0.00026394	329.2	4.8	326.2	5.3	0.0517068	0.00093235	0.052306	0.00073348	0.372909	0.0086236	0.4366	0.0160949	0.0001703	272.5	40.8	328.7	4.5	321.8	6.4
C1216_1-14.1	522.698	433.434	23.5892	-0.0674242	0.213006	0.850671	-3.723e-05	0.00012549	0.0541809	0.00026699	0.0521402	0.0006608	0.389514	0.00529652	0.671056	0.0165822	0.00023483	378.5	11.2	327.6	4	334	3.9	2	332.4	4.7	0.0520492	0.00068556	0.016558	0.00022888	327.1	4.2	331.9	4.6	0.0547259	0.00198361	0.0521756	0.00067196	0.3937	0.0152105	0.240011	0.0166695	0.00031251	401.1	79.2	327.9	4.2	337.1	11.2
C1216_1-15.1	478.902	98.7792	21.2328	0.687506	-0.227813	0.211596	0.00037959	0.00018785	0.0560276	0.0004169	0.0512236	0.00081749	0.39571	0.00696792	0.652557	0.0149456	0.00042254	453.5	16.4	322	5	338.5	5.1	4.8	299.8	8.4	0.0510052	0.0008451	0.0148693	0.00041845	320.7	5.2	298.3	8.3	0.0504401	0.00299357	0.0508681	0.00083066	0.353774	0.0218137	0.190679	0.0114311	0.00177218	215.3	132	319.8	5	307.6	16.5
C1216_1-16.1	497.789	324.269	22.6813	0.725808	-0.0252841	0.668265	0.00040074	0.00015281	0.0543269	0.00123097	0.0526419	0.00086999	0.394322	0.0110589	0.424281	0.0164613	0.00031902	384.7	50	330.7	5.3	337.5	8.1	2	330	6.4	0.0525389	0.00094805	0.0164323	0.00029268	330.1	5.8	329.4	5.8	0.0484133	0.00271177	0.0522565	0.00087603	0.348827	0.0204338	0.206049	0.0152545	0.00048997	119.5	127	328.4	5.4	303.8	15.5
C1216_1-16.2	1332.17	371.473	60.347	0.331386	-0.0670015	0.28606	0.00018297	2.99e-05	0.0534707	0.00029793	0.0523367	0.00065202	0.385857	0.00526594	0.657261	0.0161594	0.00021781	348.9	12.4	328.9	4	331.3	3.8	0.8	324	4.4	0.0523103	0.00069248	0.0161456	0.00021151	328.7	4.2	323.7	4.2	0.0507786	0.00055709	0.0521618	0.00065047	0.365206	0.00620706	0.528273	0.0148797	0.00022491	230.9	25	327.8	4	316.1	4.6
C1216_1-17.1	854.494	556.183	39.4985	0.295971	0.0397913	0.667725	0.00016341	8.155e-05	0.0531307	0.00035206	0.053405	0.00045241	0.391229	0.00420772	0.567113	0.0167935	0.00016834	334.3	15	335.4	2.8	335.3	3.1	0	336.6	3.4	0.0534046	0.00048633	0.0167944	0.0001624	335.4	3	336.6	3.2	0.0507261	0.00132928	0.0532456	0.00045802	0.372409	0.0103587	0.222661	0.016294	0.0002617	228.5	59.4	334.4	2.8	321.4	7.7
C1216_1-18.1	3181.45	1113.87	146.173	0.11003	0.0161962	0.359169	6.075e-05	1.272e-05	0.0524926	0.00019548	0.0523591	0.0007561	0.384197	0.00565639	0.706211	0.0166857	0.00025998	306.9	8.6	329	4.6	330.1	4.1	0.4	334.4	5.1	0.0523919	5.081e-05	0.0166938	0.00026197	329.2	0.3	334.6	5.2	0.0515996	0.00027946	0.052301	0.00075536	0.372101	0.00589425	0.656461	0.0161198	0.00012274	267.7	12.4	328.6	4.6	321.2	4.4
C1216_1-19.1	1009.55	859.104	46.1338	0.249271	-0.103539	0.872983	0.00013763	3.829e-05	0.0537009	0.00030416	0.0527959	0.00075877	0.390919	0.00603871	0.669856	0.0164324	0.00027328	358.5	12.8	331.7	4.7	335	4.4	1	329.4	5.4	0.0527511	0.0007972	0.0164172	0.00026835	331.4	4.9	329.1	5.3	0.0516781	0.00067434	0.0526632	0.00075776	0.375248	0.00741351	0.524385	0.0161142	0.00015481	271.3	29.6	330.9	4.7	323.5	5.5
C1216_1-2.1	1018.72	611.397	46.3399	0.571932	0.121276	0.615682	0.00031578	8.247e-05	0.0546456	0.00024278	0.0525545	0.00084018	0.395976	0.00657032	0.693711	0.0166685	0.00029081	397.7	10	330.2	5.2	338.7	4.8	2.6	334.1	5.8	0.0524409	0.00087508	0.0166335	0.00028559	329.5	5.4	333.4	5.7	0.0499948	0.00132238	0.0522513	0.00083908	0.360186	0.0112208	0.371142	0.015638	0.00029402	194.7	60.4	328.3	5.1	312.4	8.5
C1216_1-20.1	892.374	883.971	41.108	0.326544	-0.0932528	1.0162	0.00018029	4.42e-05	0.0527852	0.00074287	0.0532218	0.00087982	0.387352	0.00840955	0.548237	0.0165907	0.00029723	319.5	31.8	334.3	5.4	332.4	6.1	-0.6	332.6	6	0.0532412	0.0009498	0.0165982	0.00027967	334.4	5.8	332.7	5.6	0.0501303	0.00101895	0.0530466	0.00087797	0.366659	0.00970146	0.450381	0.0162299	0.00012791	201.1	46.4	333.2	5.4	317.2	7.3
C1216_1-21.1	916.886	702.61	42.4036	2.69342	2.77565	0.786118	0.0014871	9.641e-05	0.0739192	0.00255165	0.0534314	0.0007727	0.544576	0.0203815	0.27821	0.0202271	0.00047531	1039.3	68.2	335.6	4.8	441.4	13.5	24	404.7	9.4	0.0520002	0.00094219	0.0197217	0.00040507	326.8	5.8	394.7	8	0.0520735	0.00304815	0.0519797	0.00075758	0.373212	0.0225533	0.173649	0.0163626	0.00045113	288.7	128.4	326.7	4.7	322	16.8
C1216_1-22.1	1323.75	1158.22	61.0493	0.168951	-0.0451477	0.897582	9.328e-05	6.487e-05	0.0527607	0.00045408	0.0532823	0.00094117	0.387613	0.00761615	0.64726	0.0166475	0.00032092	318.5	19.4	334.6	5.7	332.6	5.6	-0.6	333.7	6.4	0.0532902	0.00096697	0.0166536	0.00031484	334.7	5.9	333.8	6.3	0.0513892	0.00111518	0.0531916	0.00094168	0.376894	0.0106424	0.451413	0.0164359	0.00019291	258.3	49.2	334.1	5.8	324.8	7.9
C1216_1-23.1	1470.41	2395.61	67.0668	0.295788	-0.440811	1.67135	0.00016331	4.06e-05	0.0525982	0.00024124	0.0526963	0.00074596	0.382169	0.00568679	0.684946	0.0162977	0.00023769	311.5	10.4	331.1	4.6	328.6	4.2	-0.8	326.7	4.7	0.0527185	0.00076977	0.0163015	0.00023393	331.2	4.7	326.8	4.7	0.0501935	0.00068233	0.0525391	0.00074476	0.363609	0.00726067	0.511122	0.0161009	7.062e-05	203.9	31.4	330.1	4.6	314.9	5.4
C1216_1-24.1	425.916	313.865	19.2879	0.540473	-0.260192	0.755976	0.00029841	0.00012249	0.0542038	0.00020166	0.0523203	0.00080329	0.391025	0.00617726	0.69975	0.0160659	0.000258	379.5	8.4	328.8	5	335.1	4.5	1.8	322.1	5.1	0.052245	0.00084377	0.016035	0.00025369	328.3	5.2	321.5	5.1	0.0498078	0.00194026	0.0520351	0.00080744	0.357353	0.0150397	0.265464	0.0152763	0.00033317	186.1	88.2	327	4.9	310.2	11.3
C1216_1-25.1	2135.62	1176.93	101.826	4.11285	3.80005	0.565348	0.0022708	0.00034691	0.0838966	0.00231731	0.0550866	0.000672	0.637228	0.0192411	0.290886	0.0243446	0.00051555	1290.1	52.8	345.7	4.1	500.6	12	31	486.1	10.2	0.0529145	0.0008216	0.0234825	0.00042975	332.4	5	469.1	8.5	0.050472	0.0061644	0.0528023	0.00073259	0.367458	0.0451876	0.0812329	0.0158874	0.00136166	216.9	260.6	331.7	4.5	317.8	34.2
C1216_1-26.1	818.753	238.735	38.0302	0.404918	-0.0109198	0.299125	0.00022356	3.348e-05	0.053212	0.00054043	0.0536644	0.00081044	0.393731	0.00716569	0.597462	0.0167744	0.00029186	337.9	22.8	337	5	337.1	5.2	0	336.2	5.8	0.0536497	0.00084641	0.0167693	0.00028692	336.9	5.2	336.1	5.7	0.049919	0.0007562	0.0534454	0.0008078	0.367858	0.00798281	0.501477	0.0152417	0.00027144	191.3	34.8	335.6	4.9	318.1	6
C1216_1-3.1	811.261	734.042	37.0319	0.0590574	-0.0127964	0.928217	3.261e-05	4.309e-05	0.0537386	0.00037654	0.0527382	0.00083917	0.390766	0.00679404	0.65894	0.0165153	0.00027882	360.1	15.8	331.3	5.1	334.9	4.9	1	331.1	5.6	0.0526858	0.00086997	0.0165027	0.00026629	331	5.3	330.8	5.3	0.0532603	0.00077367	0.0527068	0.0008397	0.387057	0.00846073	0.524754	0.0164445	0.00012348	339.9	32.6	331.1	5.1	332.2	6.2
C1216_1-4.1	1114.43	1081.39	49.821	0.579864	0.202592	0.995446	0.00032016	3.24e-05	0.0543703	0.00028041	0.0516499	0.00084574	0.387201	0.00664727	0.686741	0.01638	0.00027599	386.5	11.4	324.6	5.1	332.3	4.9	2.4	328.4	5.5	0.0515434	0.0008712	0.0163518	0.00026897	324	5.3	327.8	5.4	0.049653	0.00058332	0.0513477	0.00084135	0.351537	0.0072	0.576004	0.0157447	8.44e-05	178.7	27.2	322.8	5.2	305.9	5.4
C1216_1-5.1	647.534	563.363	28.6745	-0.0158901	-0.273102	0.892514	-8.773e-06	6.915e-05	0.0523682	0.00044007	0.0511614	0.00103305	0.369415	0.00807942	0.664732	0.0157591	0.00032476	301.5	19	321.6	6.3	319.2	6	-0.8	316	6.5	0.0511682	0.00105783	0.0157636	0.00032031	321.7	6.5	316.1	6.4	0.052497	0.00116939	0.0511696	0.00103524	0.370383	0.0112251	0.480641	0.0157784	0.00016265	307.1	50	321.7	6.4	319.9	8.3
C1216_1-6.1	3024.87	1943.72	138.117	0.809018	0.5341	0.659199	0.00044668	4.189e-05	0.0583349	0.00032446	0.0521997	0.00070493	0.42431	0.00614149	0.671768	0.0173424	0.00023697	542.3	12.2	328	4.3	359.1	4.4	8.6	347.5	4.7	0.0518207	0.00016544	0.0172322	0.00022627	325.7	1	345.3	4.5	0.0517706	0.00073832	0.0517736	0.00070032	0.36957	0.00738542	0.487347	0.0158079	0.00013294	275.3	32.4	325.4	4.3	319.3	5.5
C1216_1-7.1	1217.58	402.044	56.6273	2.61479	2.18481	0.33874	0.00144369	0.00019752	0.072372	0.00247257	0.0537328	0.00073136	0.536184	0.0197189	0.266476	0.023716	0.00088748	996.5	67.8	337.4	4.5	435.9	13.1	22.6	473.7	17.5	0.0523919	0.00089385	0.0232243	0.00080142	329.2	5.5	464	15.8	0.0511394	0.00406872	0.0523158	0.000738	0.368887	0.0298365	0.125574	0.0149614	0.00145411	247.1	173.6	328.7	4.5	318.8	22.3
C1216_1-8.1	1760.78	2755.28	77.8987	0.174891	-0.286393	1.60528	9.656e-05	2.433e-05	0.0529903	0.00032583	0.0511134	0.00068132	0.373453	0.00548207	0.653793	0.0158829	0.00022403	328.3	14	321.4	4.2	322.2	4.1	0.2	318.5	4.5	0.051103	0.00072142	0.0158792	0.00021774	321.3	4.4	318.4	4.3	0.0515709	0.0005024	0.0510232	0.0006805	0.362808	0.00613331	0.568032	0.0157654	6.341e-05	266.5	22.2	320.8	4.2	314.3	4.6
C1216_1-8.2	2407.89	3371.06	107.388	0.130957	-0.524161	1.43621	7.23e-05	2.139e-05	0.0524339	0.00044447	0.0515262	0.00097933	0.372515	0.00775241	0.657566	0.0158466	0.00030335	304.3	19.2	323.9	6	321.5	5.7	-0.8	317.8	6.1	0.0515434	0.00101443	0.0158541	0.00029585	324	6.2	317.9	5.9	0.0513708	0.00055742	0.0514581	0.00097824	0.36448	0.00808569	0.616994	0.0157474	3.504e-05	257.5	24.8	323.5	6	315.6	6.1
C1216_1-9.1	1037.17	487.973	47.1061	0.00820123	-0.245208	0.48265	4.528e-06	5.722e-05	0.0525886	0.00047695	0.0524729	0.00079702	0.380479	0.00673098	0.618182	0.0159298	0.00026438	311.1	20.6	329.7	4.9	327.4	5	-0.8	319.4	5.3	0.0524899	0.00083198	0.0159295	0.00025969	329.8	5.1	319.4	5.2	0.0525221	0.00101566	0.0524685	0.00079883	0.379967	0.00945157	0.440688	0.015911	0.00026023	308.3	43.4	329.7	4.9	327	7
Sample C1216-4																															329.249	5.02542
C12164-10.1	2962.9	1046.68	144.355	0.192539	0.0839047	0.362399	0.00010624	3.16e-06	0.055021	9.55e-05	0.055768	0.00071905	0.426834	0.00550255	0.720111	0.0178814	0.00029426	413.1	3.8	349.8	4.4	360.9	3.9	3	358.2	5.8	0.0556457	0.00072922	0.0178465	0.00029897	349.1	4.5	357.5	5.9	0.0534631	9.847e-05	0.05566	0.00072044	0.410113	0.00536182	0.712819	0.0170916	0.00030786	348.5	4.2	349.2	4.4	349	3.9
C12164-11.1	3138.37	3805.54	144.102	1.06849	1.99964	1.24395	0.00058956	5.567e-05	0.0662036	0.00196865	0.0523717	0.00169368	0.484021	0.0211178	0.533683	0.0180821	0.00114324	812.9	61	329.1	10.4	400.8	14.5	17.8	362.2	22.7	0.0514781	0.00181175	0.0177911	0.00108636	323.6	11.1	356.4	21.6	0.0576024	0.00228727	0.0518075	0.00171216	0.411281	0.0212475	0.460593	0.0169022	0.00122529	514.7	85	325.6	10.5	349.8	15.4
C12164-13.1	2265.79	1457.13	107.798	0.0545379	0.184902	0.659729	3.011e-05	2.707e-05	0.054222	0.00024163	0.0549666	0.00070031	0.410753	0.00554418	0.679626	0.0175044	0.00024331	380.3	10	344.9	4.2	349.4	4	1.2	350.7	4.8	0.0548927	0.00072616	0.0174839	0.00024362	344.5	4.4	350.3	4.8	0.0537806	0.00024375	0.0549364	0.0007007	0.407185	0.00551169	0.67844	0.0174086	0.00024465	361.9	10.2	344.8	4.3	346.8	3.9
C12164-14.1	5074.72	2042.62	251.397	0.299861	0.684873	0.41292	0.00016556	6.416e-06	0.0562312	0.00019586	0.0542872	0.00120934	0.443548	0.00949847	0.74898	0.0197917	0.0004397	461.5	7.8	340.8	7.4	372.8	6.8	8.6	396.1	8.7	0.0540748	0.00122721	0.0197469	0.00043898	339.5	7.5	395.2	8.7	0.0538044	0.00020532	0.0541232	0.001213	0.401335	0.00912413	0.709785	0.0179409	0.00048506	362.9	8.6	339.8	7.4	342.6	6.6
C12164-15.1	957.038	867.449	42.5995	0.437628	0.878697	0.92983	0.00024162	2.401e-05	0.0579803	0.00037302	0.0514263	0.00066005	0.410933	0.00589976	0.643664	0.0170002	0.00024514	529.1	14	323.3	4.1	349.5	4.2	7.4	340.7	4.9	0.0510867	0.00069696	0.0168951	0.00023952	321.2	4.3	338.6	4.8	0.0544412	0.00039903	0.0511991	0.00066298	0.384146	0.00571591	0.626586	0.0164891	0.0002531	389.3	16.4	321.9	4.1	330.1	4.2
C12164-16.1	2112.24	2127.77	100.894	2.62839	3.22525	1.0334	0.00145118	2.035e-05	0.0790977	0.00107548	0.0551865	0.00102795	0.601593	0.0138736	0.581545	0.0203324	0.0004069	1174.5	26.8	346.3	6.3	478.2	8.8	27.6	406.8	8.1	0.0533556	0.00109383	0.0196914	0.00037132	335.1	6.7	394.1	7.4	0.0579351	0.0015083	0.0537248	0.00105596	0.428966	0.0139931	0.433824	0.0173712	0.00048068	527.3	56	337.3	6.4	362.4	10
C12164-17.1	2126.26	664.578	97.3038	0.171605	0.232177	0.32064	9.475e-05	7.102e-06	0.0557558	0.00035658	0.0528716	0.00090368	0.406273	0.00741418	0.674341	0.0173318	0.00032696	442.7	14.2	332.1	5.5	346.2	5.4	4	347.3	6.5	0.0526695	0.00091531	0.0172775	0.00032077	330.9	5.6	346.2	6.4	0.0543679	0.00036631	0.0527801	0.00090525	0.395475	0.00728749	0.670146	0.0167346	0.00033863	386.3	15	331.6	5.6	338.4	5.4
C12164-18.1	3774.89	3814.96	174.57	0.980778	0.936411	1.03675	0.00054151	1.874e-05	0.0622583	0.00161533	0.0520665	0.00070717	0.458436	0.0133527	0.335745	0.0176024	0.00028585	683.1	54.4	327.2	4.3	383.2	9.4	14.6	352.7	5.7	0.0514292	0.00080519	0.0174034	0.00024821	323.3	4.9	348.7	4.9	0.0543258	0.0018697	0.0515512	0.00071425	0.385968	0.0143196	0.268883	0.0161137	0.00031319	384.5	75.6	324	4.3	331.4	10.5
C12164-19.1	1371.8	366.24	65.6416	0.00925685	0.01537	0.273882	5.111e-06	4.759e-07	0.0536605	0.00023526	0.0552838	0.00047614	0.408845	0.0039512	0.641649	0.0173739	0.0001642	356.9	9.8	346.9	2.9	348	2.8	0.4	348.1	3.2	0.0552527	0.00049582	0.0173681	0.0001599	346.7	3	348	3.2	0.0535856	0.00023561	0.0552786	0.00047618	0.408236	0.00394825	0.641291	0.0173345	0.00016457	353.7	9.8	346.8	2.9	347.6	2.8
C12164-2.1	1767.05	942.624	84.4508	6.43281	5.08396	0.547241	0.00354945	8.161e-05	0.107174	0.0007737	0.055216	0.00050414	0.815571	0.00949284	0.564786	0.0271466	0.00034227	1751.9	13.2	346.5	3.1	605.6	5.3	42.8	541.3	6.7	0.0513803	0.00054054	0.0254087	0.00029721	323	3.3	507.1	5.9	0.0552375	0.0016077	0.0516346	0.00054877	0.39308	0.0121796	0.246961	0.0134526	0.00107465	421.9	63.6	324.5	3.3	336.6	8.9
C12164-20.1	3415.75	1639	146.956	2.0334	2.71317	0.492246	0.00112267	6.118e-05	0.0756042	0.00358686	0.0487958	0.00092713	0.517919	0.0264022	0.268358	0.0209071	0.00109061	1084.7	92.2	307.1	5.7	423.8	17.9	27.6	418.2	21.6	0.047327	0.0011167	0.0203526	0.00097279	298.1	6.9	407.2	19.3	0.0592594	0.00467229	0.0477925	0.00094696	0.390322	0.0317317	0.175483	0.0162634	0.0014113	576.7	162.6	301	5.9	334.6	23.4
C12164-20.2	345.382	159.178	16.7551	4.19616	4.9782	0.472794	0.00231678	6.695e-05	0.0880591	0.0028574	0.0560476	0.00071623	0.680201	0.0237215	0.263828	0.0290212	0.00122183	1383.7	61.2	351.5	4.3	526.9	14.4	33.2	578.2	24	0.0535353	0.00088695	0.0279233	0.00108682	336.2	5.4	556.6	21.4	0.0541119	0.00485553	0.0536776	0.00074971	0.400306	0.0363525	0.110736	0.0185267	0.00194049	375.7	190.2	337.1	4.6	341.9	26.7
C12164-21.1	3659.36	692.208	170.005	0.0418197	0.207687	0.194053	2.309e-05	1.624e-06	0.0535815	0.00024289	0.0524296	0.00097155	0.396356	0.00739597	0.71501	0.0179896	0.00032883	353.5	10.2	329.4	5.9	339	5.4	2.8	360.3	6.5	0.0523756	0.00098446	0.0179875	0.00033092	329.1	6	360.3	6.6	0.0532428	0.00024454	0.0524075	0.00097196	0.384556	0.00734752	0.698888	0.017334	0.00034126	339.1	10.4	329.3	6	330.4	5.4
C12164-23.1	3217.02	1158.79	153.911	0.302859	0.491321	0.369523	0.00016721	1.372e-05	0.0557948	0.00023224	0.0544818	0.000873	0.425035	0.00694215	0.706357	0.0187658	0.00031925	444.3	9.2	342	5.4	359.6	4.9	4.8	375.7	6.3	0.0543037	0.00090896	0.0187181	0.00032151	340.9	5.6	374.8	6.4	0.0533423	0.00024366	0.0543156	0.00087567	0.399303	0.00669092	0.692731	0.0175548	0.00034131	343.5	10.2	341	5.4	341.1	4.8
C12164-24.1	1655.87	449.876	76.9159	0.00090759	0.0648315	0.278711	5.011e-07	2.512e-07	0.0527968	8.47e-05	0.0536659	0.00057512	0.390491	0.00423137	0.712067	0.0170642	0.00023631	320.1	3.6	337	3.5	334.7	3.1	-0.6	342	4.7	0.0536824	0.00059326	0.0170762	0.00023433	337.1	3.6	342.2	4.7	0.0527894	8.471e-05	0.0536654	0.00057512	0.390434	0.00423085	0.712062	0.0170605	0.00023636	319.7	3.8	337	3.5	334.7	3.1
C12164-25.1	874.638	595.701	38.8695	0.304272	1.07484	0.698697	0.00016799	1.855e-05	0.056934	0.00028928	0.051344	0.00077723	0.402872	0.00643289	0.682576	0.0175791	0.00031493	488.9	11.2	322.8	4.8	343.7	4.6	6	352.2	6.3	0.0510704	0.00079853	0.017499	0.00030941	321.1	4.9	350.6	6.1	0.0544735	0.00030328	0.0511864	0.00077962	0.384278	0.00623171	0.676239	0.017107	0.00032369	390.7	12.4	321.8	4.8	330.2	4.6
C12164-26.1	2325.58	832.766	150.425	23.9018	29.2519	0.367351	0.0131966	0.00034077	0.277075	0.00401987	0.0747307	0.00114689	2.85367	0.0602671	0.523215	0.140933	0.00278769	3346.5	22.6	464.6	6.9	1369.8	16	66	2664.6	49.4	0.0533392	0.00120664	0.112164	0.00181012	335	7.4	2148.5	32.9	0.0930809	0.0157855	0.0567629	0.00208887	0.728167	0.126363	0.152683	0.0384544	0.0111494	1489.5	291	355.9	12.7	555.5	77.1
C12164-27.1	1710.69	1713.26	78.3576	2.2021	2.71055	1.0274	0.00121582	1.188e-05	0.0722836	0.00046582	0.0529199	0.00067948	0.527186	0.0075737	0.643498	0.0190592	0.0002659	993.9	13	332.4	4.1	429.9	5	22.6	381.6	5.3	0.0515923	0.00069117	0.0186123	0.00024886	324.3	4.2	372.7	4.9	0.0544764	0.00063214	0.0517442	0.00069494	0.388486	0.0068952	0.544812	0.0166646	0.0003059	390.9	25.8	325.2	4.2	333.3	5.1
C12164-28.1	2557.86	771.944	125.113	0.0804322	0.256977	0.309597	4.441e-05	4.169e-06	0.0548145	0.0002807	0.0564456	0.00057104	0.426908	0.00483619	0.642983	0.018625	0.00021837	404.7	11.4	354	3.5	361	3.5	2	373	4.4	0.0563501	0.0005918	0.0186072	0.00021095	353.4	3.6	372.6	4.2	0.0541638	0.0002843	0.0563999	0.0005715	0.421011	0.0048045	0.639319	0.0182944	0.00022231	377.9	11.8	353.7	3.5	356.8	3.5
C12164-29.1	1922.58	1713.19	91.3908	0.43984	0.817264	0.914132	0.00024284	1.054e-05	0.0570038	0.00018093	0.0549196	0.00049012	0.431457	0.00408675	0.678373	0.0180875	0.00018289	491.7	7	344.7	3	364.2	2.9	5.4	362.3	3.6	0.0546636	0.00051376	0.0180127	0.00017711	343.1	3.1	360.8	3.5	0.0534425	0.00019385	0.0546763	0.0004923	0.40271	0.00390915	0.667846	0.0175302	0.00018879	347.7	8.2	343.2	3	343.6	2.8
C12164-3.1	1571.6	1051.93	72.2546	0.0703901	0.80673	0.686646	3.884e-05	1.607e-06	0.0542153	0.00018576	0.0531168	0.00113309	0.39688	0.00857476	0.710888	0.017817	0.00038671	380.1	7.6	333.6	6.9	339.4	6.3	1.8	356.9	7.7	0.0530288	0.00114462	0.0178012	0.00038746	333.1	7	356.6	7.7	0.0536459	0.00018787	0.0530791	0.00113389	0.392433	0.00849517	0.710516	0.0177022	0.00038922	356.3	7.8	333.4	6.9	336.1	6.2
C12164-4.1	2324.04	959.004	107.807	0.101374	0.430321	0.423318	5.594e-05	4.352e-06	0.0553625	0.00027908	0.0535939	0.00086171	0.408919	0.00689038	0.687026	0.0178594	0.00032485	426.9	11.2	336.5	5.2	348.1	5	3.4	357.8	6.5	0.0534209	0.00086998	0.0178213	0.00031765	335.5	5.3	357	6.3	0.0545433	0.00028356	0.0535392	0.00086259	0.402457	0.00681336	0.685211	0.0175888	0.00032985	393.5	11.6	336.2	5.3	343.4	4.9
C12164-5.1	1879.96	671.121	86.9508	1.04988	4.55488	0.36622	0.00057929	6.796e-06	0.086763	0.00136962	0.0534362	0.00079276	0.638964	0.0138419	0.493083	0.0298831	0.00082906	1355.3	30	335.6	4.9	501.7	8.6	33.2	595.1	16.3	0.0511193	0.0008752	0.0288189	0.00076176	321.4	5.4	574.2	15	0.0785331	0.00152933	0.0528709	0.00080124	0.572236	0.0141203	0.442189	0.0266524	0.00092958	1160.5	38	332.1	4.9	459.5	9.2
C12164-6.1	3426.95	684.714	163.841	0.230197	0.463985	0.20497	0.00012702	2.549e-06	0.0598543	0.00020951	0.0542121	0.00053315	0.455643	0.00467823	0.689651	0.0198373	0.00056435	598.3	7.6	340.3	3.2	381.2	3.2	10.8	397	11.2	0.0537315	0.00054438	0.0197015	0.00055872	337.4	3.3	394.3	11.1	0.0580022	0.0002167	0.0540864	0.00053439	0.432353	0.00456698	0.673459	0.018186	0.00061559	529.9	8.2	339.6	3.3	364.8	3.2
C12164-7.1	5597.82	650.793	232.054	20.303	21.4584	0.119265	0.0112027	0.00036301	0.220819	0.00521869	0.0449265	0.00089756	1.45754	0.0439623	0.476905	0.191955	0.00738135	2986.7	37.6	283.3	5.5	913	18.3	69	3548.8	125.5	0.0351805	0.00100187	0.192539	0.00738516	222.9	6.2	3558.7	124.8	0.057323	0.0253774	0.0356442	0.00238904	0.281594	0.126085	0.107778	0.0178479	0.0798685	503.9	758.2	225.8	14.9	251.9	105.1
C12164-8.1	2808.17	1639	132.114	0.0548312	0.431789	0.598746	3.025e-05	7.284e-06	0.0542929	0.00015376	0.0540193	0.00083272	0.406708	0.00633639	0.712395	0.0177746	0.00028434	383.3	6.2	339.2	5.1	346.5	4.6	2.2	356.1	5.7	0.053944	0.000857	0.0177609	0.00027791	338.7	5.2	355.8	5.5	0.0538494	0.00015511	0.0539895	0.00083318	0.400679	0.00629014	0.707776	0.0175607	0.00028781	364.7	6.6	339	5.1	342.1	4.5
C12164-9.1	1866.52	574.915	87.9273	0.23678	0.131804	0.31598	0.00013065	9.826e-06	0.0556338	4.285e-05	0.0544252	0.00033557	0.417296	0.00259291	0.714446	0.0174997	0.0002314	437.7	1.8	341.6	2	354.1	1.8	3.6	350.6	4.6	0.0542383	0.00033014	0.0174487	0.00023207	340.5	2	349.6	4.6	0.0537185	4.449e-05	0.0542955	0.00033637	0.40197	0.00251242	0.713651	0.01664	0.00024338	359.3	1.8	340.8	2	343.1	1.8
Sample C1216-5
C12165-1.1	1949.2	637.391	89.7453	0.00822223	0.0115781	0.335458	4.528e-06	1.001e-06	0.0528555	9.764e-05	0.0531942	0.00076577	0.38749	0.00562391	0.714145	0.0167052	0.00027725	322.7	4.2	334.1	4.7	332.5	4.1	-0.4	334.8	5.5	0.0532085	0.00078167	0.0167089	0.00027862	334.2	4.8	334.9	5.5	0.052789	9.777e-05	0.0531898	0.00076583	0.386971	0.00561752	0.714116	0.0166778	0.00027771	319.7	4.2	334.1	4.7	332.2	4.2
C12165-10.1	403.851	171.176	17.7113	-0.030949	0.148304	0.434821	-1.704e-05	4.254e-05	0.0534764	0.00038427	0.0506686	0.00072996	0.373428	0.00601191	0.644302	0.0162281	0.00041349	349.1	16.2	318.6	4.5	322.2	4.5	1.2	325.3	8.2	0.050614	0.00075842	0.016211	0.00041052	318.3	4.7	325	8.2	0.0534764	0.00038427	0.0506686	0.00072996	0.373428	0.00601191	0.644302	0.0162281	0.00041349	349.1	16.2	318.6	4.5	322.2	4.5
C12165-11.1	948.597	635.083	50.9641	12.8279	12.7336	0.686812	0.0070638	0.00011922	0.16955	0.00245971	0.0620715	0.00062382	1.45043	0.0255976	0.410011	0.0410158	0.00065832	2553.3	24	388.2	3.8	910	10.6	57.4	812.4	12.8	0.0528165	0.00073084	0.0353504	0.00044396	331.8	4.5	702.1	8.7	0.0678116	0.00706357	0.0540707	0.00077045	0.505327	0.0531274	0.0975823	0.016625	0.00252648	862.9	202.2	339.5	4.7	415.3	36.5
C12165-12.1	2245.73	916.538	105.892	0.413054	0.518882	0.418679	0.00022745	6.019e-06	0.0569509	0.00022321	0.0544772	0.00065497	0.427584	0.00540699	0.684545	0.0183877	0.00025781	489.7	8.6	342	4.1	361.5	3.9	5.4	368.2	5.1	0.0542219	0.00067924	0.0183099	0.00025997	340.4	4.2	366.7	5.2	0.053616	0.00023808	0.0542511	0.0006577	0.400875	0.00517562	0.676076	0.017257	0.00027472	354.9	10	340.6	4.1	342.3	3.8
C12165-13.1	2535.57	2094.79	115.941	0.172888	-0.0346911	0.847526	9.52e-05	4.111e-06	0.0551945	7.062e-05	0.0527911	0.00077039	0.401858	0.00588272	0.717755	0.016517	0.00057222	420.1	2.8	331.6	4.7	343	4.3	3.4	331.1	11.4	0.0526368	0.0007809	0.0164675	0.00057649	330.7	4.8	330.1	11.5	0.053799	7.258e-05	0.0526994	0.00077173	0.390738	0.00574621	0.716964	0.0162786	0.0005806	362.7	3	331.1	4.8	334.9	4.2
C12165-14.1	1568.58	1356.42	82.6788	9.96165	11.7611	0.887109	0.00548549	0.0002079	0.140633	0.00118666	0.0608972	0.00058007	1.1803	0.0150197	0.538953	0.0337039	0.00043749	2235.1	14.4	381.1	3.5	791.5	7.1	51.8	669.9	8.5	0.0540911	0.00061239	0.0301942	0.00034594	339.6	3.8	601.2	6.8	0.0609391	0.00306041	0.0548041	0.00074802	0.460272	0.0239537	0.188831	0.0193202	0.00238034	637.1	104.6	343.9	4.5	384.4	16.7
C12165-15.1	1714.54	1139.66	80.0412	5.78857	4.33739	0.681895	0.00318754	9.847e-05	0.108483	0.00363664	0.0539357	0.0006425	0.806385	0.0286883	0.241082	0.0233455	0.00076964	1774.1	60	338.6	3.9	600.4	16.2	43.6	466.4	15.2	0.0500763	0.00084532	0.0217622	0.00061129	315	5.2	435.1	12.1	0.0622499	0.00673026	0.0507926	0.00069155	0.435757	0.0474848	0.0899589	0.0137023	0.00157707	682.7	215.4	319.4	4.3	367.3	34.2
C12165-16.1	1835.93	435.921	80.9392	0.0430332	0.196531	0.243579	2.37e-05	5.389e-06	0.0552339	0.00136199	0.0509346	0.00152682	0.387725	0.0150496	0.556041	0.0168005	0.00106493	421.7	54.2	320.3	9.4	332.7	11.1	3.8	336.7	21.2	0.050777	0.00163129	0.0167542	0.00104076	319.3	10	335.8	20.7	0.054887	0.00137119	0.0509125	0.00152748	0.385123	0.0150358	0.553298	0.016611	0.00107708	407.7	54.8	320.1	9.4	330.8	11.1
C12165-17.1	993.82	274.31	46.0768	0.0450224	0.0338827	0.283154	2.479e-05	4.358e-06	0.0538496	0.00033017	0.0535654	0.00062204	0.397533	0.00522035	0.636704	0.0169113	0.0002903	364.7	13.8	336.4	3.8	339.9	3.8	1	338.9	5.7	0.053519	0.00065888	0.0168951	0.00028644	336.1	4	338.6	5.7	0.0534861	0.00033256	0.0535412	0.00062232	0.39467	0.00520244	0.63487	0.0167321	0.00029341	349.5	14	336.2	3.8	337.8	3.8
C12165-18.1	760.734	152.984	35.6521	1.63597	1.71519	0.206301	0.00090087	3.082e-05	0.0678909	0.00069726	0.0541455	0.00037244	0.506617	0.00626222	0.400659	0.0260841	0.00061682	865.3	21	339.9	2.3	416.2	4.3	18.4	520.4	12.1	0.0531105	0.00041739	0.0257335	0.00059662	333.6	2.6	513.5	11.8	0.0547004	0.0008799	0.053255	0.00037878	0.401473	0.00706118	0.291168	0.0170481	0.00094581	400.1	35.6	334.5	2.3	342.7	5.1
C12165-19.1	1944.49	2086.84	90.3755	1.02282	1.29817	1.10096	0.00056323	3.138e-05	0.0650865	0.00125282	0.0536976	0.00069148	0.481673	0.0111549	0.40035	0.0179319	0.00033399	777.1	40	337.2	4.2	399.2	7.7	15.6	359.2	6.6	0.0528655	0.0007753	0.0176652	0.00030343	332.1	4.8	353.9	6	0.0568619	0.00144893	0.0531454	0.00069869	0.416479	0.0119418	0.330122	0.016882	0.00035701	486.1	55.4	333.8	4.3	353.5	8.6
C12165-2.1	1909.9	577.223	88.2745	0.285202	0.61666	0.310043	0.00015705	6.118e-06	0.0570498	0.00012492	0.0533992	0.00074317	0.41985	0.00591505	0.711251	0.0188502	0.00027944	493.5	4.8	335.4	4.6	355.9	4.2	5.8	377.4	5.5	0.0531268	0.0007663	0.0187736	0.00028044	333.7	4.7	375.9	5.6	0.0547504	0.00013054	0.0532461	0.00074531	0.401773	0.00570479	0.709777	0.0178165	0.00029566	402.1	5.2	334.4	4.5	342.9	4.1
C12165-20.1	2216.24	1782.16	103.552	1.71785	2.58289	0.824934	0.00094595	0.00021311	0.0728708	0.00627971	0.0539821	0.00063297	0.542137	0.0471496	0.0970723	0.0200137	0.00108801	1010.3	165.6	338.9	3.8	439.8	31.5	23	400.5	21.6	0.0526042	0.00105256	0.0195401	0.00090496	330.5	6.5	391.1	17.9	0.059096	0.00787974	0.0530497	0.00064782	0.432063	0.0578515	0.0656652	0.0176478	0.00130883	570.7	266.4	333.2	3.9	364.6	41.8
C12165-21.1	2012.11	746	92.5409	0.903763	0.977196	0.380344	0.00049767	2.313e-05	0.061438	0.0005499	0.0531363	0.00055047	0.449919	0.00615969	0.544821	0.0193441	0.00025065	654.7	19	333.7	3.3	377.2	4.3	11.6	387.2	5	0.0525552	0.00059127	0.0191618	0.00024129	330.2	3.6	383.6	4.8	0.054146	0.00062969	0.0526534	0.00055554	0.392915	0.00616971	0.483787	0.0166865	0.00029177	377.1	26	330.8	3.4	336.5	4.5
C12165-22.1	1143.19	1436.29	54.0168	4.8503	5.34625	1.28888	0.00267087	6.172e-05	0.0960116	0.00168455	0.054591	0.00081477	0.722354	0.0166392	0.466517	0.0209297	0.00038914	1548.1	32.6	342.6	4.9	552.1	9.9	38	418.6	7.7	0.0515597	0.00088641	0.0198176	0.00032949	324.1	5.4	396.6	6.5	0.0570174	0.00298252	0.0519271	0.00085853	0.408044	0.0223851	0.216992	0.0166045	0.0006202	492.3	111.2	326.3	5.2	347.5	16.3
C12165-23.1	961.972	207.887	38.1022	3.08334	4.0466	0.221694	0.00170267	5.005e-05	0.0822366	0.00085636	0.0457612	0.00063278	0.518643	0.00897794	0.575153	0.0312584	0.00055346	1251.1	20.4	288.44	3.9	424.24	6.02	32	622.07	10.85	0.0439758	0.00066328	0.030361	0.00051199	277.43	4.09	604.48	10.03	0.0573893	0.00126694	0.0443313	0.00065415	0.350629	0.00931047	0.400104	0.0177874	0.0009898	506.5	47.8	279.62	4.03	305.19	7.02
C12165-24.1	1086.14	329.223	49.6947	0.476089	1.04616	0.310952	0.0002629	1.816e-05	0.0600519	0.00115709	0.0528607	0.00074058	0.437488	0.0104224	0.42342	0.0201126	0.00038282	605.5	41.2	332.06	4.53	368.48	7.39	9.8	402.45	7.59	0.0523691	0.0008053	0.0199715	0.00035727	329.05	4.93	399.65	7.08	0.0562097	0.00124215	0.0526069	0.00074416	0.407531	0.0106929	0.388168	0.0184042	0.00041847	460.7	48.2	330.51	4.56	347.1	7.75
C12165-25.1	482.328	286.561	21.7455	0.158543	-0.115912	0.609485	8.755e-05	2.953e-05	0.0544902	0.00043652	0.0520879	0.0024884	0.391166	0.0189481	0.710086	0.0161399	0.00234101	391.3	18	327.33	15.27	335.22	13.92	2.4	323.59	46.62	0.0519725	0.00253737	0.0161049	0.00235083	326.63	15.57	322.89	46.71	0.0532059	0.00044777	0.0520046	0.00249239	0.381336	0.0185556	0.709149	0.0158539	0.00238326	337.7	18.8	326.82	15.29	328.02	13.73
C12165-26.1	1228.18	565.82	55.714	0.00465762	0.0173891	0.472611	2.572e-06	1.34e-05	0.0534859	0.00036986	0.0524096	0.00047472	0.386328	0.00440253	0.572288	0.0164646	0.00019055	349.5	15.6	329.3	2.91	331.68	3.23	0.8	330.04	3.79	0.0523756	0.00050759	0.0164544	0.00018064	329.1	3.12	329.85	3.59	0.0534482	0.00037014	0.0524072	0.00047474	0.386038	0.00440185	0.572	0.0164537	0.00019068	347.9	15.6	329.28	2.91	331.47	3.23
C12165-27.1	1057.85	846.159	46.2724	2.18399	2.80992	0.820573	0.00120603	6.115e-05	0.0728785	0.00068873	0.0505368	0.00046939	0.50759	0.00672587	0.504691	0.0190276	0.00018998	1010.5	19.2	317.82	2.88	416.83	4.54	23.8	380.94	3.77	0.0492166	0.00050192	0.0185639	0.00017473	309.71	3.08	371.74	3.47	0.0552311	0.00092954	0.0494216	0.00048076	0.37619	0.00731278	0.360303	0.0161855	0.00028335	421.7	37	310.97	2.95	324.23	5.41
C12165-28.1	1509.14	1478.86	70.0686	3.10951	2.63866	1.00528	0.00171712	0.00010769	0.0825349	0.00146108	0.0536419	0.00060752	0.610165	0.0128229	0.388018	0.0193123	0.00022893	1258.3	34.2	336.84	3.72	483.66	8.11	30.4	386.58	4.54	0.0515988	0.00068751	0.0186062	0.0001836	324.33	4.21	372.58	3.65	0.0574797	0.00216653	0.051959	0.00063056	0.411606	0.0162986	0.220662	0.0158092	0.00052744	510.1	80.6	326.54	3.87	350.03	11.79
C12165-29.1	108.535	42.4755	5.07229	1.53527	2.0697	0.401475	0.0008478	7.645e-05	0.0711507	0.00197034	0.053994	0.00094678	0.529457	0.0173541	0.38518	0.0223881	0.000528	961.7	55.6	339	5.8	431.45	11.59	21.4	447.48	10.44	0.0527348	0.00106047	0.0219432	0.0004619	331.3	6.5	438.68	9.14	0.0588005	0.00242173	0.0531583	0.00096192	0.430782	0.0193789	0.289621	0.0180305	0.00066985	559.7	87.4	333.88	5.89	363.73	13.84
C12165-3.1	2019.75	688.891	92.2163	0.0665845	-0.00718627	0.349899	3.667e-05	8.339e-06	0.0542541	0.00018541	0.0527498	0.00067035	0.394421	0.00519043	0.695299	0.0165105	0.00022646	381.7	7.6	331.4	4.1	337.6	3.8	1.8	331	4.5	0.0526695	0.00070592	0.0164825	0.00022419	330.9	4.3	330.4	4.5	0.0537166	0.00018739	0.0527145	0.0006708	0.390251	0.00514925	0.694381	0.0162992	0.0002294	359.3	7.8	331.2	4.1	334.6	3.8
C12165-30.1	602.779	534.525	27.5122	0.00242756	0.233014	0.909701	1.341e-06	2.056e-06	0.0535562	0.00038659	0.0527324	0.00036063	0.389218	0.00387024	0.495193	0.0167709	0.00012275	352.5	16.2	331.28	2.21	333.8	2.83	0.8	336.13	2.44	0.0526826	0.0003777	0.0167607	0.00011285	330.98	2.32	335.93	2.25	0.0535365	0.00038674	0.0527311	0.00036064	0.389066	0.00387036	0.495008	0.016768	0.00012277	351.7	16.2	331.27	2.21	333.69	2.84
C12165-31.1	1499.09	1130.49	69.8368	0.13222	0.0980957	0.773618	7.301e-05	1.655e-05	0.0542711	0.00019387	0.0538228	0.00048471	0.40257	0.00390018	0.669269	0.0169884	0.00018233	382.3	8	337.95	2.97	343.51	2.83	1.6	340.46	3.63	0.0537396	0.00050117	0.0169635	0.00018208	337.45	3.07	339.96	3.62	0.0532	0.00019804	0.0537511	0.00048535	0.394099	0.00384911	0.665654	0.0167943	0.00018446	337.3	8.4	337.51	2.97	337.36	2.81
C12165-32.1	397.051	298.951	17.9504	0.189489	0.366242	0.7724	0.00010464	1.649e-05	0.0558838	0.00042886	0.052232	0.00088124	0.40228	0.00745629	0.655388	0.016831	0.00036381	447.7	17	328.21	5.4	343.3	5.41	4.4	337.33	7.24	0.0520345	0.00092994	0.0167708	0.00035859	327.01	5.71	336.13	7.13	0.054351	0.0004418	0.0521322	0.00088293	0.390498	0.00733595	0.649109	0.0165605	0.00036977	385.7	18	327.6	5.41	334.73	5.37
C12165-4.1	1302.41	623.26	58.7474	2.74374	0.35537	0.490921	0.00151087	6.333e-05	0.0755318	0.00025238	0.0521136	0.00113191	0.542483	0.0119213	0.711629	0.0170673	0.00038725	1082.7	6.6	327.5	7	440.1	7.9	25.6	342	7.7	0.0505977	0.00113276	0.0165731	0.00037812	318.2	7	332.2	7.5	0.0533726	0.00036844	0.050674	0.00116457	0.372743	0.00894437	0.689563	0.0109327	0.00069105	344.7	15.6	318.7	7.2	321.7	6.7
C12165-5.1	2487.41	1031.29	114.07	0.136216	0.339336	0.425327	7.501e-05	1.286e-05	0.0547327	0.00016345	0.0529824	0.00098398	0.399654	0.00751764	0.710868	0.0174316	0.00042173	401.3	6.8	332.8	6	341.4	5.5	2.6	349.3	8.4	0.0528655	0.00099924	0.0174034	0.0004197	332.1	6.1	348.7	8.3	0.0536329	0.00016704	0.0529098	0.00098533	0.391087	0.00738427	0.710138	0.0170745	0.00043056	355.7	7	332.4	6.1	335.2	5.4
C12165-6.1	1914.29	644.942	87.9659	0.0611751	0.0256331	0.345623	3.369e-05	1.818e-06	0.0537844	0.00028388	0.0530906	0.0007787	0.393531	0.00613444	0.677469	0.0167149	0.00026636	362.1	11.8	333.5	4.8	336.9	4.4	1	335	5.3	0.0530451	0.00081654	0.0166989	0.00026225	333.2	5	334.7	5.2	0.0532903	0.00028669	0.0530579	0.00077918	0.389676	0.00609448	0.676063	0.0165171	0.00026955	341.1	12.2	333.3	4.8	334.1	4.4
C12165-7.1	2407.19	813.256	113.814	0.00923947	-0.0198124	0.346582	5.088e-06	3.337e-07	0.0531792	0.00010944	0.0546255	0.00077553	0.400353	0.00574333	0.712554	0.0170474	0.00025358	336.5	4.6	342.9	4.8	341.9	4.2	-0.2	341.6	5	0.0546309	0.00079888	0.017046	0.00025494	342.9	4.9	341.6	5.1	0.0531046	0.0001096	0.0546204	0.00077561	0.399754	0.00573613	0.712514	0.0170167	0.00025404	333.3	4.6	342.8	4.7	341.5	4.2
C12165-8.1	657.706	245.045	31.4117	5.66949	4.28486	0.38221	0.00312197	7.377e-05	0.103393	0.00077701	0.0551784	0.00077462	0.78626	0.01252	0.63477	0.0294795	0.00065545	1685.9	13.8	346.2	4.7	589	7.1	41.2	587.2	12.9	0.0516086	0.00078246	0.0277809	0.00059708	324.4	4.8	553.8	11.7	0.0578609	0.00147392	0.0520312	0.00082545	0.414911	0.0124514	0.380625	0.012248	0.00173366	524.5	55	327	5.1	352.4	9
C12165-1.1	2075.95	593.522	97.6021	0.284928	0.153701	0.293298	0.00015726	1.987e-05	0.0522052	0.0002155	0.054319	0.00172014	0.390994	0.0124865	0.71396	0.0175842	0.00062045	294.5	9.4	341	10.5	335.1	9.2	-1.8	352.3	12.3	0.0543855	0.00175558	0.0176148	0.00062007	341.4	10.7	352.9	12.3	0.0498887	0.00037972	0.0541632	0.00171532	0.372573	0.0122093	0.695815	0.0164715	0.00023223	189.9	17.6	340	10.5	321.6	9.1
C12165-10.1	4487.73	2153.06	225.445	4.09677	4.05796	0.492173	0.00226119	0.00011399	0.0869876	0.00145207	0.055732	0.0015873	0.69612	0.0223041	0.640009	0.0274478	0.00085823	1360.3	31.8	349.6	9.7	536.5	13.5	34.8	547.2	16.8	0.0533065	0.00059038	0.0264189	0.00078873	334.8	3.6	527	15.5	0.0538438	0.00240125	0.0534316	0.00152619	0.396678	0.0210566	0.387431	0.0165719	0.00063434	364.5	97.6	335.6	9.4	339.2	15.4
C12165-11.1	2438.43	1000.37	109.52	0.317778	-0.0110766	0.420861	0.0001754	1.623e-05	0.0537586	0.00011351	0.0518912	0.00157186	0.384633	0.0116793	0.718257	0.0162407	0.00050184	360.9	4.8	326.1	9.6	330.4	8.6	1.4	325.6	10	0.0518207	0.00158444	0.0162211	0.00050136	325.7	9.7	325.2	10	0.0511792	0.00027936	0.0517249	0.0015669	0.365004	0.0113119	0.703777	0.0154138	0.00012161	248.9	12.6	325.1	9.6	315.9	8.4
C12165-12.1	2182.08	712.591	99.5497	2.33805	2.47519	0.335011	0.00129047	0.00010329	0.072278	0.00065191	0.0527083	0.000907	0.525279	0.0102053	0.637709	0.0242559	0.00050462	993.7	18.4	331.1	5.5	428.7	6.8	22.8	484.4	10	0.0513803	0.00091761	0.0237662	0.00047731	323	5.6	474.7	9.4	0.053351	0.00178722	0.0514653	0.00089118	0.378583	0.0143415	0.329116	0.0164921	0.00068267	343.7	74.2	323.5	5.5	326	10.6
C12165-13.1	6213.23	1700.27	317.843	4.55433	13.1099	0.280731	0.00251373	7.145e-05	0.0957222	0.00105084	0.0547131	0.00221922	0.780048	0.030516	0.746509	0.0738049	0.00280042	1542.3	20.6	343.4	13.6	585.5	17.5	41.4	1439.1	52.7	0.0517065	0.00199913	0.0732507	0.00294457	325	12.2	1428.7	55.4	0.0591187	0.00160985	0.0522007	0.00211852	0.425505	0.0208523	0.596265	0.0495944	0.00063954	571.5	58.2	328	13	360	15
C12165-13.2	2555.18	1330.04	116.617	2.01812	2.00673	0.533988	0.00111389	4.913e-05	0.069409	0.00116634	0.0526707	0.0009109	0.504625	0.0121614	0.516676	0.0203408	0.00053522	910.9	34.2	330.9	5.6	414.8	8.2	20.2	407	10.6	0.0515434	0.00091739	0.0199589	0.00049799	324	5.6	399.4	9.9	0.053066	0.00142657	0.0515986	0.00089361	0.377536	0.0121495	0.387473	0.0161172	0.00043799	331.7	59.8	324.3	5.5	325.2	9
C12165-14.1	2766.58	698.7	121.462	1.17367	1.26042	0.259082	0.0006478	4.409e-05	0.0621378	0.00068987	0.0504529	0.00070342	0.434578	0.00772002	0.565079	0.0208688	0.00036769	678.9	23.6	317.3	4.3	366.4	5.5	13.4	417.4	7.3	0.049832	0.00048132	0.0206758	0.0003485	313.5	3	413.6	6.9	0.052628	0.00098815	0.049855	0.00069627	0.361768	0.00856551	0.424698	0.0159311	0.00039772	312.9	42	313.6	4.2	313.5	6.4
C12165-14.2	537.022	388.159	34.8766	8.59091	13.8258	0.741491	0.00474169	0.00017198	0.128611	0.00104062	0.0750329	0.00164143	1.33056	0.0310348	0.67529	0.0494183	0.00119434	2079.1	14.2	466.4	9.8	859.1	13.6	45.8	974.9	23.1	0.067966	0.00159654	0.0455798	0.0010739	423.9	9.6	900.8	20.8	0.059611	0.00315955	0.0685952	0.00151866	0.563799	0.0324488	0.276965	0.031173	0.00079733	589.5	111	427.7	9.2	454	21.3
C12165-15.1	2163.32	931.765	91.7699	0.367848	0.112298	0.44185	0.00020303	2.533e-05	0.0569715	0.00015956	0.0490105	0.00078249	0.384991	0.00624054	0.709171	0.015622	0.00025904	490.5	6.2	308.4	4.8	330.7	4.6	6.8	313.3	5.2	0.0487089	0.0007914	0.0155324	0.00025812	306.6	4.9	311.5	5.1	0.053996	0.0004295	0.0488284	0.00077991	0.363528	0.00661773	0.631736	0.01476	0.00012606	370.9	17.8	307.3	4.8	314.8	4.9
C12165-16.1	2837.15	1086.02	129.076	12.8252	14.0049	0.392684	0.00707879	0.00038363	0.159289	0.00244897	0.0522078	0.00104199	1.15442	0.028961	0.572811	0.05338	0.00155742	2448.1	25.8	328.1	6.4	779.3	13.7	57.8	1051	29.9	0.0450549	0.00077001	0.0471589	0.00125308	284.1	4.8	931.3	24.2	0.0557779	0.0074633	0.0454304	0.00097829	0.349392	0.0473683	0.114362	0.0169606	0.00224946	443.5	272.8	286.4	6	304.3	36.3
C12165-17.1	2659.73	972.835	115.126	1.63145	1.26818	0.375224	0.00090047	5.804e-05	0.064456	0.00115158	0.049849	0.00107302	0.444441	0.0124093	0.555075	0.0190244	0.000516	756.7	37.2	313.6	6.6	373.4	8.8	16	380.9	10.3	0.0490831	0.00097855	0.0187736	0.00048433	308.9	6	375.9	9.6	0.0512137	0.0014921	0.0490275	0.00105667	0.346202	0.0126084	0.426091	0.0143855	0.00041367	250.5	65.6	308.5	6.4	301.9	9.6
C12165-18.1	4257.38	1647.2	189.192	0.101212	-0.154724	0.396911	5.586e-05	1.231e-05	0.0525202	0.00020307	0.0495372	0.00146478	0.371793	0.0107042	0.739468	0.0157142	0.0004505	308.1	8.8	311.7	9	321	8	2.8	315.1	8.9	0.0495389	0.00032013	0.0157133	0.00045137	311.7	2	315.1	9	0.0516992	0.0002804	0.0494866	0.00146333	0.352757	0.0106811	0.703148	0.0148951	6.859e-05	272.1	12.4	311.4	9	306.8	8.1
C12165-19.1	317.821	94.5423	14.2684	0.866	0.620633	0.305163	0.00047798	0.0001324	0.0549671	0.00080272	0.0518683	0.00080118	0.393106	0.00835625	0.523191	0.0183658	0.00039904	410.9	32.4	326	4.9	336.6	6.1	3.2	367.8	7.9	0.0517228	0.00085294	0.0183402	0.00038434	325.1	5.2	367.3	7.6	0.0479091	0.00224374	0.0514152	0.00080404	0.339636	0.0168142	0.227434	0.0152591	0.00090485	0	202.1	323.2	4.9	296.9	12.8
C12165-2.1	982.887	188.904	45.7786	0.734526	0.46851	0.197163	0.00040542	7.105e-05	0.0555952	0.00029147	0.0538107	0.00077971	0.412487	0.00635604	0.677046	0.0194534	0.00032429	436.3	11.6	337.9	4.8	350.7	4.6	3.6	389.4	6.4	0.0536334	0.00080001	0.0194241	0.00031826	336.8	4.9	388.8	6.3	0.0496214	0.00115926	0.0534125	0.00077708	0.36544	0.0101435	0.377383	0.0152249	0.00075732	177.3	53.6	335.4	4.7	316.3	7.6
C12165-20.1	2189.83	857.486	95.7826	2.62233	2.63408	0.401703	0.00144738	0.00015918	0.0776558	0.00078373	0.0505343	0.00061444	0.541083	0.00855007	0.554017	0.0223635	0.00038643	1138.1	20	317.8	3.8	439.1	5.6	27.6	447	7.6	0.0489041	0.00064587	0.0217268	0.00036044	307.8	4	434.4	7.1	0.0565108	0.00268685	0.0491958	0.00061601	0.383322	0.0188974	0.182876	0.0153957	0.00080709	472.5	101.8	309.6	3.8	329.5	14
C12165-21.1	3649.58	1025.66	158.839	0.117162	-0.157851	0.288302	6.467e-05	1.405e-05	0.052747	0.00019876	0.049127	0.00094808	0.3657	0.00703155	0.722653	0.0152271	0.00036219	317.9	8.6	309.2	5.9	316.5	5.3	2.4	305.4	7.2	0.0491157	0.00018521	0.0152159	0.0003633	309.1	1.1	305.2	7.2	0.0517967	0.00029697	0.0490689	0.00094704	0.350439	0.00716792	0.679383	0.0144553	0.00023272	276.5	13	308.8	5.8	305.1	5.5
C12165-22.1	2631.6	1134.09	112.239	0.217329	-0.103388	0.442096	0.00011995	4.084e-06	0.0530889	0.00029303	0.0491458	0.0004941	0.360695	0.00412853	0.632419	0.0152365	0.00019395	332.7	12.4	309.3	3.1	312.7	3.1	1	305.6	3.9	0.0490994	0.00038465	0.0152209	0.00018939	309	2.4	305.3	3.8	0.0513251	0.0003006	0.049038	0.00049303	0.34703	0.00422729	0.594262	0.014686	0.0001156	255.5	13.4	308.6	3	302.5	3.2
C12165-23.1	614.467	487.353	26.1054	3.54637	2.91495	0.813644	0.00195739	0.00016183	0.0812937	0.00145749	0.0490842	0.00073907	0.550178	0.0128812	0.463045	0.018634	0.0003127	1228.5	34.8	308.9	4.5	445.1	8.5	30.6	373.1	6.2	0.047262	0.00081951	0.0179724	0.00027377	297.7	5.1	360	5.4	0.0525559	0.00303426	0.0473241	0.00072727	0.342933	0.0205255	0.184868	0.0141125	0.00039987	309.7	126.4	298.1	4.5	299.4	15.6
C12165-24.1	1505.4	843.947	64.1642	0.13002	-0.753632	0.575113	7.176e-05	3.162e-05	0.0525543	0.00053442	0.0492438	0.00079625	0.356832	0.00681599	0.609492	0.0142186	0.0003931	309.7	23	309.9	4.9	309.8	5.1	0	285.3	7.8	0.0492459	0.00084876	0.0142017	0.00038995	309.9	5.2	285	7.8	0.0514993	0.00072979	0.0491791	0.00079572	0.34921	0.00761569	0.534181	0.0139835	0.00032907	263.3	32.2	309.5	4.9	304.1	5.7
C12165-25.1	2672.14	989.793	115.043	0.617692	0.448526	0.379992	0.00034093	4.924e-05	0.0579277	0.00031106	0.0495692	0.00137921	0.397283	0.0112206	0.709309	0.0167632	0.00046744	527.1	11.6	311.9	8.5	339.7	8.2	8.2	336	9.3	0.0492296	0.00124398	0.0166586	0.00046128	309.8	7.7	333.9	9.2	0.0529246	0.00083737	0.0492599	0.00137134	0.359464	0.0115831	0.622035	0.0150036	0.00024955	325.5	35.6	310	8.5	311.8	8.7
C12165-3.1	1972.86	745.212	90.0561	1.65771	-0.127954	0.387501	0.00091496	0.00084127	0.05112	0.00035691	0.0527384	0.00072284	0.371725	0.00571785	0.641561	0.0161856	0.00045999	246.3	16	331.3	4.4	320.9	4.2	-3.2	324.5	9.2	0.0528655	0.00075361	0.0162211	0.00045474	332.1	4.6	325.2	9	0.0374343	0.0134002	0.0518568	0.00107811	0.267658	0.0959783	0.0417441	0.0114245	0.00439681	0	233.3	325.9	6.6	240.8	79.9
C12165-4.1	4346.32	2760.28	215.366	0.301953	0.0618414	0.651508	0.00016666	2.063e-05	0.0534393	8.361e-05	0.0551345	0.00118003	0.421822	0.00871979	0.745462	0.0180305	0.00041514	347.5	3.6	346	7.2	357.4	6.3	3.2	361.2	8.3	0.0551218	0.00094504	0.0180379	0.00041785	345.9	5.8	361.3	8.3	0.0509877	0.00033493	0.0549669	0.00117663	0.386431	0.00876415	0.679567	0.016826	0.00018495	240.3	15	344.9	7.2	331.8	6.5
C12165-5.1	2057.41	664.216	94.7897	1.11345	1.12123	0.331191	0.00061456	2.593e-05	0.0625649	0.00074544	0.0532293	0.00113926	0.459183	0.011248	0.629092	0.020262	0.00057135	693.5	25.2	334.3	7	383.7	7.9	12.8	405.4	11.3	0.0525715	0.00118468	0.0200548	0.0005563	330.3	7.3	401.3	11	0.0535536	0.00085868	0.0526319	0.00112676	0.388635	0.0104888	0.571121	0.0164864	0.00038483	352.3	35.8	330.7	6.9	333.4	7.7
C12165-6.1	2819.27	1001.92	129.256	0.487339	0.226357	0.364572	0.00026898	2.057e-05	0.0555837	0.00060143	0.0526311	0.00168435	0.405954	0.0136356	0.686	0.0172511	0.00057472	435.7	24	330.7	10.4	346	9.9	4.4	345.7	11.4	0.0524572	0.00140215	0.017202	0.00056337	329.6	8.6	344.7	11.2	0.0516301	0.00068575	0.0523725	0.00167619	0.37283	0.0129889	0.661439	0.0156565	0.00019989	269.1	30.2	329.1	10.3	321.7	9.6
C12165-7.1	3281.1	1327.43	151.399	1.48404	1.35156	0.415032	0.0008191	2.715e-05	0.0644102	0.0005631	0.0524777	0.00170478	0.473447	0.0156956	0.705536	0.0201153	0.00065956	755.1	18.4	329.7	10.4	393.6	10.9	16.2	402.5	13.1	0.0516902	0.00090144	0.019863	0.00064423	324.9	5.5	397.5	12.8	0.052382	0.00071653	0.0516922	0.00167946	0.373346	0.0132298	0.660141	0.0158409	0.00018428	302.1	31	324.9	10.3	322.1	9.8
C12165-8.1	3273.98	1717.48	156.157	6.62147	6.92717	0.538152	0.00365467	0.00018154	0.107746	0.00074553	0.0542525	0.00135276	0.818657	0.0208799	0.703894	0.0309091	0.00077303	1761.7	12.6	340.6	8.3	607.3	11.7	44	615.2	15.1	0.0504347	0.00051799	0.0289767	0.0007114	317.2	3.2	577.3	14	0.0542003	0.00315215	0.0506272	0.00127515	0.378347	0.0240173	0.285676	0.016338	0.00071222	379.3	125.8	318.4	7.9	325.8	17.8
C12165-8.2	943.765	388.596	44.2276	4.48674	2.6158	0.4224	0.00247643	0.00011207	0.0877972	0.00097391	0.0541426	0.00052796	0.655426	0.00968025	0.47537	0.0235318	0.00037498	1378.1	21.2	339.9	3.2	511.8	5.9	33.6	470.1	7.4	0.0517228	0.00057489	0.0225714	0.00033271	325.1	3.5	451.1	6.6	0.051387	0.00210327	0.0516925	0.00051612	0.366257	0.0154868	0.170011	0.0113946	0.00061878	258.3	91.4	324.9	3.2	316.9	11.6
C12165-9.1	2125.19	1068.1	95.9125	1.28559	0.294374	0.515588	0.00070957	7.312e-05	0.0619306	0.00021599	0.0521419	0.00082197	0.445242	0.00718856	0.703001	0.0169195	0.0005473	671.7	7.4	327.7	5.1	373.9	5	12.4	339.1	10.9	0.0515434	0.0008446	0.016729	0.00054144	324	5.2	335.3	10.8	0.0514994	0.00118129	0.0514657	0.0008143	0.365447	0.0102683	0.405437	0.0141755	0.00034467	263.3	51.8	323.5	5	316.3	7.7
SHRIMPTOOLS data processing; IBERSIMS laboratory, University of Granada, Spain
Errors are at one sigma level. The error in 206/238 averaging the standard has been already propagated. Th/U ratios are atomic (232/238), not in weight
Point-to point errors, calculated on replicates of the TEMORA standard, are: 0.35 % for 206Pb/238U, and 0.31 % for 207Pb/206Pb
[truncated: 17 more columns]
